# Supplementary material
Source: PubMed Central journal article supplement (PMC9283223)
Supplement: NIHMS1798735-supplement-Supplementary_Table_1.pdf [file NIHMS1798735-supplement-Supplementary_Table_1.pdf]

**Supplementary Table 1. Statistical tests used in Figure 1 – 6**

| Figure                    | Sample size                                                   | Statistic test                                                                                                                                                                                    | P value                                                                                                                                                                                                                                                                                                                                                                                                                                                                                                                                                                                                                                                                                                                                                                                                                                                                                                                                                                                                                                                                                                                                                                                                                                                                                                      |  |      |     |                          |           |           |                          |           |           |                          |           |           |                           |           |           |                           |           |           |                           |           |           |
|---------------------------|---------------------------------------------------------------|---------------------------------------------------------------------------------------------------------------------------------------------------------------------------------------------------|--------------------------------------------------------------------------------------------------------------------------------------------------------------------------------------------------------------------------------------------------------------------------------------------------------------------------------------------------------------------------------------------------------------------------------------------------------------------------------------------------------------------------------------------------------------------------------------------------------------------------------------------------------------------------------------------------------------------------------------------------------------------------------------------------------------------------------------------------------------------------------------------------------------------------------------------------------------------------------------------------------------------------------------------------------------------------------------------------------------------------------------------------------------------------------------------------------------------------------------------------------------------------------------------------------------|--|------|-----|--------------------------|-----------|-----------|--------------------------|-----------|-----------|--------------------------|-----------|-----------|---------------------------|-----------|-----------|---------------------------|-----------|-----------|---------------------------|-----------|-----------|
| 1c                        | 20 each (10 males + 10 females)                               | Repeated-measure two-way ANOVA<br>Assume sphericity? No<br>Factor 1: Time<br>Factor 2: Treatment (Ctrl, SD)                                                                                       | Time x Treatment, $F(4, 152) = 1.398$ $P=0.2374$<br>Time, $F(2.589, 98.39) = 2.209$ $P=0.1008$<br>Treatment, $F(1, 38) = 1.029$ $P=0.3169$<br>Subject, $F(38, 152) = 2.175$ $P=0.0005$                                                                                                                                                                                                                                                                                                                                                                                                                                                                                                                                                                                                                                                                                                                                                                                                                                                                                                                                                                                                                                                                                                                       |  |      |     |                          |           |           |                          |           |           |                          |           |           |                           |           |           |                           |           |           |                           |           |           |
| 1d                        | 20 each (10 males + 10 females)                               | Repeated-measure two-way ANOVA<br>Assume sphericity? No<br>Factor 1: Time<br>Factor 2: Treatment (Ctrl, SD)                                                                                       | Time x Treatment, $F(4, 152) = 0.6330$ $P=0.6397$<br>Time, $F(3.657, 139.0) = 16.83$ $P=0.00000000119916$<br>Treatment, $F(1, 38) = 0.2470$ $P=0.6221$<br>Subject, $F(38, 152) = 4.104$ $P<0.0001$                                                                                                                                                                                                                                                                                                                                                                                                                                                                                                                                                                                                                                                                                                                                                                                                                                                                                                                                                                                                                                                                                                           |  |      |     |                          |           |           |                          |           |           |                          |           |           |                           |           |           |                           |           |           |                           |           |           |
| 1e                        | 20 each (10 males + 10 females)                               | Repeated-measure two-way ANOVA<br>Assume sphericity? No<br>Factor 1: Time<br>Factor 2: Treatment (Ctrl, SD)                                                                                       | Time x Treatment, $F(4, 152) = 1.243$ $P=0.2953$<br>Time, $F(3.086, 117.3) = 3.978$ $P=0.0091$<br>Treatment, $F(1, 38) = 6.269$ $P=0.0167$<br>Subject, $F(38, 152) = 1.669$ $P=0.0161$                                                                                                                                                                                                                                                                                                                                                                                                                                                                                                                                                                                                                                                                                                                                                                                                                                                                                                                                                                                                                                                                                                                       |  |      |     |                          |           |           |                          |           |           |                          |           |           |                           |           |           |                           |           |           |                           |           |           |
| 1f                        | 20 each (10 males + 10 females)                               | Repeated-measure two-way ANOVA<br>Assume sphericity? No<br>Factor 1: Time<br>Factor 2: Treatment (Ctrl, SD)                                                                                       | Time x Treatment, $F(4, 152) = 0.1925$ $P=0.9420$<br>Time, $F(3.544, 134.7) = 13.67$ $P=0.00000010816056$<br>Treatment, $F(1, 38) = 7.806$ $P=0.0081$<br>Subject, $F(38, 152) = 2.906$ $P<0.0001$                                                                                                                                                                                                                                                                                                                                                                                                                                                                                                                                                                                                                                                                                                                                                                                                                                                                                                                                                                                                                                                                                                            |  |      |     |                          |           |           |                          |           |           |                          |           |           |                           |           |           |                           |           |           |                           |           |           |
| 1g                        | 20 each (10 males + 10 females)                               | Repeated-measure two-way ANOVA<br>Assume sphericity? No<br>Factor 1: Stimulus (Tria 1 E, Tria 1 S1, Tria 2 S1, Tria 2 S2)<br>Factor 2: Treatment (Ctrl, SD)<br>Tukey's multiple comparisons test  | Stimulus x Treatment, $F(3, 114) = 6.226$ $P=0.0006$<br>Stimulus, $F(2.014, 76.52) = 83.36$ $P<0.0001$<br>Treatment, $F(1, 38) = 0.9826$ $P=0.3278$<br>Subject, $F(38, 114) = 2.599$ $P<0.0001$<br>Multiple comparisons P:<br><table style="width: 100%; border-collapse: collapse;"> <thead> <tr> <th></th> <th style="text-align: center;">Ctrl</th> <th style="text-align: center;">SD</th> </tr> </thead> <tbody> <tr> <td>Trial 1 E vs. Trial 1 S1</td> <td style="text-align: center;">0.0000023</td> <td style="text-align: center;">0.0000001</td> </tr> <tr> <td>Trial 1 E vs. Trial 2 S1</td> <td style="text-align: center;">0.1720371</td> <td style="text-align: center;">0.1081043</td> </tr> <tr> <td>Trial 1 E vs. Trial 2 S2</td> <td style="text-align: center;">0.0000004</td> <td style="text-align: center;">0.0059640</td> </tr> <tr> <td>Trial 1 S1 vs. Trial 2 S1</td> <td style="text-align: center;">0.0000016</td> <td style="text-align: center;">0.0000015</td> </tr> <tr> <td>Trial 1 S1 vs. Trial 2 S2</td> <td style="text-align: center;">0.0964569</td> <td style="text-align: center;">0.0000191</td> </tr> <tr> <td>Trial 2 S1 vs. Trial 2 S2</td> <td style="text-align: center;">0.0000008</td> <td style="text-align: center;">0.5340232</td> </tr> </tbody> </table> |  | Ctrl | SD  | Trial 1 E vs. Trial 1 S1 | 0.0000023 | 0.0000001 | Trial 1 E vs. Trial 2 S1 | 0.1720371 | 0.1081043 | Trial 1 E vs. Trial 2 S2 | 0.0000004 | 0.0059640 | Trial 1 S1 vs. Trial 2 S1 | 0.0000016 | 0.0000015 | Trial 1 S1 vs. Trial 2 S2 | 0.0964569 | 0.0000191 | Trial 2 S1 vs. Trial 2 S2 | 0.0000008 | 0.5340232 |
|                           | Ctrl                                                          | SD                                                                                                                                                                                                |                                                                                                                                                                                                                                                                                                                                                                                                                                                                                                                                                                                                                                                                                                                                                                                                                                                                                                                                                                                                                                                                                                                                                                                                                                                                                                              |  |      |     |                          |           |           |                          |           |           |                          |           |           |                           |           |           |                           |           |           |                           |           |           |
| Trial 1 E vs. Trial 1 S1  | 0.0000023                                                     | 0.0000001                                                                                                                                                                                         |                                                                                                                                                                                                                                                                                                                                                                                                                                                                                                                                                                                                                                                                                                                                                                                                                                                                                                                                                                                                                                                                                                                                                                                                                                                                                                              |  |      |     |                          |           |           |                          |           |           |                          |           |           |                           |           |           |                           |           |           |                           |           |           |
| Trial 1 E vs. Trial 2 S1  | 0.1720371                                                     | 0.1081043                                                                                                                                                                                         |                                                                                                                                                                                                                                                                                                                                                                                                                                                                                                                                                                                                                                                                                                                                                                                                                                                                                                                                                                                                                                                                                                                                                                                                                                                                                                              |  |      |     |                          |           |           |                          |           |           |                          |           |           |                           |           |           |                           |           |           |                           |           |           |
| Trial 1 E vs. Trial 2 S2  | 0.0000004                                                     | 0.0059640                                                                                                                                                                                         |                                                                                                                                                                                                                                                                                                                                                                                                                                                                                                                                                                                                                                                                                                                                                                                                                                                                                                                                                                                                                                                                                                                                                                                                                                                                                                              |  |      |     |                          |           |           |                          |           |           |                          |           |           |                           |           |           |                           |           |           |                           |           |           |
| Trial 1 S1 vs. Trial 2 S1 | 0.0000016                                                     | 0.0000015                                                                                                                                                                                         |                                                                                                                                                                                                                                                                                                                                                                                                                                                                                                                                                                                                                                                                                                                                                                                                                                                                                                                                                                                                                                                                                                                                                                                                                                                                                                              |  |      |     |                          |           |           |                          |           |           |                          |           |           |                           |           |           |                           |           |           |                           |           |           |
| Trial 1 S1 vs. Trial 2 S2 | 0.0964569                                                     | 0.0000191                                                                                                                                                                                         |                                                                                                                                                                                                                                                                                                                                                                                                                                                                                                                                                                                                                                                                                                                                                                                                                                                                                                                                                                                                                                                                                                                                                                                                                                                                                                              |  |      |     |                          |           |           |                          |           |           |                          |           |           |                           |           |           |                           |           |           |                           |           |           |
| Trial 2 S1 vs. Trial 2 S2 | 0.0000008                                                     | 0.5340232                                                                                                                                                                                         |                                                                                                                                                                                                                                                                                                                                                                                                                                                                                                                                                                                                                                                                                                                                                                                                                                                                                                                                                                                                                                                                                                                                                                                                                                                                                                              |  |      |     |                          |           |           |                          |           |           |                          |           |           |                           |           |           |                           |           |           |                           |           |           |
| 1h                        | 20 each (10 males + 10 females)                               | Unpaired t test with Welch's correction                                                                                                                                                           | $t=0.4585$ , $df=35.99$ , Two-tailed $P = 0.6493$                                                                                                                                                                                                                                                                                                                                                                                                                                                                                                                                                                                                                                                                                                                                                                                                                                                                                                                                                                                                                                                                                                                                                                                                                                                            |  |      |     |                          |           |           |                          |           |           |                          |           |           |                           |           |           |                           |           |           |                           |           |           |
| 1i                        | 20 each (10 males + 10 females)                               | Mann-Whitney test                                                                                                                                                                                 | Mann-Whitney $U = 30.50$ , Two-tailed $P = 0.000000412545753$                                                                                                                                                                                                                                                                                                                                                                                                                                                                                                                                                                                                                                                                                                                                                                                                                                                                                                                                                                                                                                                                                                                                                                                                                                                |  |      |     |                          |           |           |                          |           |           |                          |           |           |                           |           |           |                           |           |           |                           |           |           |
| 1j                        | 12 each (Ctrl: 10 males + 2 females; SD: 11 males + 1 female) | Repeated-measure two-way ANOVA<br>Assume sphericity? No<br>Factor 1: Stimulus (Tria 1 E, Tria 1 S1, Tria 2 S1, Tria 2 S2)<br>Factor 2: Treatment (Ctrl, Res)<br>Tukey's multiple comparisons test | Stimulus x Treatment, $F(3, 66) = 0.1400$ $P=0.9357$<br>Stimulus, $F(2.195, 48.28) = 59.20$ $P<0.0001$<br>Treatment, $F(1, 22) = 0.9220$ $P=0.3474$<br>Subject, $F(22, 66) = 1.791$ $P=0.0363$<br>Multiple comparisons P:<br><table style="width: 100%; border-collapse: collapse;"> <thead> <tr> <th></th> <th style="text-align: center;">Ctrl</th> <th style="text-align: center;">Res</th> </tr> </thead> <tbody> <tr> <td>Trial 1 E vs. Trial 1 S1</td> <td style="text-align: center;">0.0000057</td> <td style="text-align: center;">0.0002747</td> </tr> <tr> <td>Trial 1 E vs. Trial 2 S1</td> <td style="text-align: center;">0.0104708</td> <td style="text-align: center;">0.0048963</td> </tr> <tr> <td>Trial 1 E vs. Trial 2 S2</td> <td style="text-align: center;">0.0005546</td> <td style="text-align: center;">0.0000610</td> </tr> <tr> <td>Trial 1 S1 vs. Trial 2 S1</td> <td style="text-align: center;">0.0000175</td> <td style="text-align: center;">0.0040384</td> </tr> <tr> <td>Trial 1 S1 vs. Trial 2 S2</td> <td style="text-align: center;">0.4979571</td> <td style="text-align: center;">0.2347252</td> </tr> <tr> <td>Trial 2 S1 vs. Trial 2 S2</td> <td style="text-align: center;">0.0030444</td> <td style="text-align: center;">0.0007702</td> </tr> </tbody> </table> |  | Ctrl | Res | Trial 1 E vs. Trial 1 S1 | 0.0000057 | 0.0002747 | Trial 1 E vs. Trial 2 S1 | 0.0104708 | 0.0048963 | Trial 1 E vs. Trial 2 S2 | 0.0005546 | 0.0000610 | Trial 1 S1 vs. Trial 2 S1 | 0.0000175 | 0.0040384 | Trial 1 S1 vs. Trial 2 S2 | 0.4979571 | 0.2347252 | Trial 2 S1 vs. Trial 2 S2 | 0.0030444 | 0.0007702 |
|                           | Ctrl                                                          | Res                                                                                                                                                                                               |                                                                                                                                                                                                                                                                                                                                                                                                                                                                                                                                                                                                                                                                                                                                                                                                                                                                                                                                                                                                                                                                                                                                                                                                                                                                                                              |  |      |     |                          |           |           |                          |           |           |                          |           |           |                           |           |           |                           |           |           |                           |           |           |
| Trial 1 E vs. Trial 1 S1  | 0.0000057                                                     | 0.0002747                                                                                                                                                                                         |                                                                                                                                                                                                                                                                                                                                                                                                                                                                                                                                                                                                                                                                                                                                                                                                                                                                                                                                                                                                                                                                                                                                                                                                                                                                                                              |  |      |     |                          |           |           |                          |           |           |                          |           |           |                           |           |           |                           |           |           |                           |           |           |
| Trial 1 E vs. Trial 2 S1  | 0.0104708                                                     | 0.0048963                                                                                                                                                                                         |                                                                                                                                                                                                                                                                                                                                                                                                                                                                                                                                                                                                                                                                                                                                                                                                                                                                                                                                                                                                                                                                                                                                                                                                                                                                                                              |  |      |     |                          |           |           |                          |           |           |                          |           |           |                           |           |           |                           |           |           |                           |           |           |
| Trial 1 E vs. Trial 2 S2  | 0.0005546                                                     | 0.0000610                                                                                                                                                                                         |                                                                                                                                                                                                                                                                                                                                                                                                                                                                                                                                                                                                                                                                                                                                                                                                                                                                                                                                                                                                                                                                                                                                                                                                                                                                                                              |  |      |     |                          |           |           |                          |           |           |                          |           |           |                           |           |           |                           |           |           |                           |           |           |
| Trial 1 S1 vs. Trial 2 S1 | 0.0000175                                                     | 0.0040384                                                                                                                                                                                         |                                                                                                                                                                                                                                                                                                                                                                                                                                                                                                                                                                                                                                                                                                                                                                                                                                                                                                                                                                                                                                                                                                                                                                                                                                                                                                              |  |      |     |                          |           |           |                          |           |           |                          |           |           |                           |           |           |                           |           |           |                           |           |           |
| Trial 1 S1 vs. Trial 2 S2 | 0.4979571                                                     | 0.2347252                                                                                                                                                                                         |                                                                                                                                                                                                                                                                                                                                                                                                                                                                                                                                                                                                                                                                                                                                                                                                                                                                                                                                                                                                                                                                                                                                                                                                                                                                                                              |  |      |     |                          |           |           |                          |           |           |                          |           |           |                           |           |           |                           |           |           |                           |           |           |
| Trial 2 S1 vs. Trial 2 S2 | 0.0030444                                                     | 0.0007702                                                                                                                                                                                         |                                                                                                                                                                                                                                                                                                                                                                                                                                                                                                                                                                                                                                                                                                                                                                                                                                                                                                                                                                                                                                                                                                                                                                                                                                                                                                              |  |      |     |                          |           |           |                          |           |           |                          |           |           |                           |           |           |                           |           |           |                           |           |           |
| 1k                        | 12 each (Ctrl: 10 males + 2 females; SD: 11                   | Unpaired t test with Welch's correction                                                                                                                                                           | $t = 0.1268$ , $df = 21.47$ , Two-tailed $P = 0.900281$                                                                                                                                                                                                                                                                                                                                                                                                                                                                                                                                                                                                                                                                                                                                                                                                                                                                                                                                                                                                                                                                                                                                                                                                                                                      |  |      |     |                          |           |           |                          |           |           |                          |           |           |                           |           |           |                           |           |           |                           |           |           |

|                                    | males +1 female)                                             |                                                                                                                                                                                                  |                                                                                                                                                                                                                                                                                                                                                                                                                                                                                                                                                                                                                                                                                                                                                                                                                                                                                                                                                                                                                                                                                                                                                                                                                                                                                                                                                                                                                                                                                                                                                                                                                                                                                           |                 |      |    |                          |           |           |                          |           |           |                          |           |           |                           |           |           |                           |           |           |                           |           |           |                   |  |  |    |       |       |         |       |        |   |        |        |      |       |       |                                    |  |  |    |              |              |
|------------------------------------|--------------------------------------------------------------|--------------------------------------------------------------------------------------------------------------------------------------------------------------------------------------------------|-------------------------------------------------------------------------------------------------------------------------------------------------------------------------------------------------------------------------------------------------------------------------------------------------------------------------------------------------------------------------------------------------------------------------------------------------------------------------------------------------------------------------------------------------------------------------------------------------------------------------------------------------------------------------------------------------------------------------------------------------------------------------------------------------------------------------------------------------------------------------------------------------------------------------------------------------------------------------------------------------------------------------------------------------------------------------------------------------------------------------------------------------------------------------------------------------------------------------------------------------------------------------------------------------------------------------------------------------------------------------------------------------------------------------------------------------------------------------------------------------------------------------------------------------------------------------------------------------------------------------------------------------------------------------------------------|-----------------|------|----|--------------------------|-----------|-----------|--------------------------|-----------|-----------|--------------------------|-----------|-----------|---------------------------|-----------|-----------|---------------------------|-----------|-----------|---------------------------|-----------|-----------|-------------------|--|--|----|-------|-------|---------|-------|--------|---|--------|--------|------|-------|-------|------------------------------------|--|--|----|--------------|--------------|
| 1l                                 | 12 each (Ctrl: 10 males + 2 females; SD: 11 males +1 female) | Unpaired t test with Welch's correction                                                                                                                                                          | t = 0.1054, df = 21.44, Two-tailed P = 0.917062                                                                                                                                                                                                                                                                                                                                                                                                                                                                                                                                                                                                                                                                                                                                                                                                                                                                                                                                                                                                                                                                                                                                                                                                                                                                                                                                                                                                                                                                                                                                                                                                                                           |                 |      |    |                          |           |           |                          |           |           |                          |           |           |                           |           |           |                           |           |           |                           |           |           |                   |  |  |    |       |       |         |       |        |   |        |        |      |       |       |                                    |  |  |    |              |              |
| 1n                                 | 13 each (10 males + 3 females)                               | Repeated-measure two-way ANOVA<br>Assume sphericity? No<br>Factor 1: Stimulus (Tria 1 E, Tria 1 S1, Tria 2 S1, Tria 2 S2)<br>Factor 2: Treatment (Ctrl, SD)<br>Tukey's multiple comparisons test | Stimulus x Treatment, F (3, 72) = 10.76 P=0.0000063<br>Stimulus, F (2.327, 55.86) = 53.58 P<0.0001<br>Treatment, F (1, 24) = 0.2687 P=0.6089<br>Subject, F (24, 72) = 7.082 P<0.0001<br>Multiple comparisons P:<br><table style="width: 100%; border: none;"> <thead> <tr> <th></th> <th style="text-align: center;">Ctrl</th> <th style="text-align: center;">SD</th> </tr> </thead> <tbody> <tr> <td>Trial 1 E vs. Trial 1 S1</td> <td style="text-align: center;">0.0000017</td> <td style="text-align: center;">0.0047030</td> </tr> <tr> <td>Trial 1 E vs. Trial 2 S1</td> <td style="text-align: center;">0.8248622</td> <td style="text-align: center;">0.1010195</td> </tr> <tr> <td>Trial 1 E vs. Trial 2 S2</td> <td style="text-align: center;">0.0000011</td> <td style="text-align: center;">0.0461483</td> </tr> <tr> <td>Trial 1 S1 vs. Trial 2 S1</td> <td style="text-align: center;">0.0000015</td> <td style="text-align: center;">0.1149412</td> </tr> <tr> <td>Trial 1 S1 vs. Trial 2 S2</td> <td style="text-align: center;">0.0034759</td> <td style="text-align: center;">0.0874396</td> </tr> <tr> <td>Trial 2 S1 vs. Trial 2 S2</td> <td style="text-align: center;">0.0007697</td> <td style="text-align: center;">0.9982539</td> </tr> </tbody> </table>                                                                                                                                                                                                                                                                                                                                                                                                      |                 | Ctrl | SD | Trial 1 E vs. Trial 1 S1 | 0.0000017 | 0.0047030 | Trial 1 E vs. Trial 2 S1 | 0.8248622 | 0.1010195 | Trial 1 E vs. Trial 2 S2 | 0.0000011 | 0.0461483 | Trial 1 S1 vs. Trial 2 S1 | 0.0000015 | 0.1149412 | Trial 1 S1 vs. Trial 2 S2 | 0.0034759 | 0.0874396 | Trial 2 S1 vs. Trial 2 S2 | 0.0007697 | 0.9982539 |                   |  |  |    |       |       |         |       |        |   |        |        |      |       |       |                                    |  |  |    |              |              |
|                                    | Ctrl                                                         | SD                                                                                                                                                                                               |                                                                                                                                                                                                                                                                                                                                                                                                                                                                                                                                                                                                                                                                                                                                                                                                                                                                                                                                                                                                                                                                                                                                                                                                                                                                                                                                                                                                                                                                                                                                                                                                                                                                                           |                 |      |    |                          |           |           |                          |           |           |                          |           |           |                           |           |           |                           |           |           |                           |           |           |                   |  |  |    |       |       |         |       |        |   |        |        |      |       |       |                                    |  |  |    |              |              |
| Trial 1 E vs. Trial 1 S1           | 0.0000017                                                    | 0.0047030                                                                                                                                                                                        |                                                                                                                                                                                                                                                                                                                                                                                                                                                                                                                                                                                                                                                                                                                                                                                                                                                                                                                                                                                                                                                                                                                                                                                                                                                                                                                                                                                                                                                                                                                                                                                                                                                                                           |                 |      |    |                          |           |           |                          |           |           |                          |           |           |                           |           |           |                           |           |           |                           |           |           |                   |  |  |    |       |       |         |       |        |   |        |        |      |       |       |                                    |  |  |    |              |              |
| Trial 1 E vs. Trial 2 S1           | 0.8248622                                                    | 0.1010195                                                                                                                                                                                        |                                                                                                                                                                                                                                                                                                                                                                                                                                                                                                                                                                                                                                                                                                                                                                                                                                                                                                                                                                                                                                                                                                                                                                                                                                                                                                                                                                                                                                                                                                                                                                                                                                                                                           |                 |      |    |                          |           |           |                          |           |           |                          |           |           |                           |           |           |                           |           |           |                           |           |           |                   |  |  |    |       |       |         |       |        |   |        |        |      |       |       |                                    |  |  |    |              |              |
| Trial 1 E vs. Trial 2 S2           | 0.0000011                                                    | 0.0461483                                                                                                                                                                                        |                                                                                                                                                                                                                                                                                                                                                                                                                                                                                                                                                                                                                                                                                                                                                                                                                                                                                                                                                                                                                                                                                                                                                                                                                                                                                                                                                                                                                                                                                                                                                                                                                                                                                           |                 |      |    |                          |           |           |                          |           |           |                          |           |           |                           |           |           |                           |           |           |                           |           |           |                   |  |  |    |       |       |         |       |        |   |        |        |      |       |       |                                    |  |  |    |              |              |
| Trial 1 S1 vs. Trial 2 S1          | 0.0000015                                                    | 0.1149412                                                                                                                                                                                        |                                                                                                                                                                                                                                                                                                                                                                                                                                                                                                                                                                                                                                                                                                                                                                                                                                                                                                                                                                                                                                                                                                                                                                                                                                                                                                                                                                                                                                                                                                                                                                                                                                                                                           |                 |      |    |                          |           |           |                          |           |           |                          |           |           |                           |           |           |                           |           |           |                           |           |           |                   |  |  |    |       |       |         |       |        |   |        |        |      |       |       |                                    |  |  |    |              |              |
| Trial 1 S1 vs. Trial 2 S2          | 0.0034759                                                    | 0.0874396                                                                                                                                                                                        |                                                                                                                                                                                                                                                                                                                                                                                                                                                                                                                                                                                                                                                                                                                                                                                                                                                                                                                                                                                                                                                                                                                                                                                                                                                                                                                                                                                                                                                                                                                                                                                                                                                                                           |                 |      |    |                          |           |           |                          |           |           |                          |           |           |                           |           |           |                           |           |           |                           |           |           |                   |  |  |    |       |       |         |       |        |   |        |        |      |       |       |                                    |  |  |    |              |              |
| Trial 2 S1 vs. Trial 2 S2          | 0.0007697                                                    | 0.9982539                                                                                                                                                                                        |                                                                                                                                                                                                                                                                                                                                                                                                                                                                                                                                                                                                                                                                                                                                                                                                                                                                                                                                                                                                                                                                                                                                                                                                                                                                                                                                                                                                                                                                                                                                                                                                                                                                                           |                 |      |    |                          |           |           |                          |           |           |                          |           |           |                           |           |           |                           |           |           |                           |           |           |                   |  |  |    |       |       |         |       |        |   |        |        |      |       |       |                                    |  |  |    |              |              |
| 1o                                 | 13 each (10 males + 3 females)                               | Unpaired t test with Welch's correction                                                                                                                                                          | t = 3.774, df = 21.44, Two-tailed P = 0.0011                                                                                                                                                                                                                                                                                                                                                                                                                                                                                                                                                                                                                                                                                                                                                                                                                                                                                                                                                                                                                                                                                                                                                                                                                                                                                                                                                                                                                                                                                                                                                                                                                                              |                 |      |    |                          |           |           |                          |           |           |                          |           |           |                           |           |           |                           |           |           |                           |           |           |                   |  |  |    |       |       |         |       |        |   |        |        |      |       |       |                                    |  |  |    |              |              |
| 1p                                 | 13 each (10 males + 3 females)                               | Unpaired t test with Welch's correction                                                                                                                                                          | t = 4.643, df = 16.44, Two-tailed P = 0.0003                                                                                                                                                                                                                                                                                                                                                                                                                                                                                                                                                                                                                                                                                                                                                                                                                                                                                                                                                                                                                                                                                                                                                                                                                                                                                                                                                                                                                                                                                                                                                                                                                                              |                 |      |    |                          |           |           |                          |           |           |                          |           |           |                           |           |           |                           |           |           |                           |           |           |                   |  |  |    |       |       |         |       |        |   |        |        |      |       |       |                                    |  |  |    |              |              |
| 1r                                 | 13 each (5 males + 8 females)                                | Repeated-measure two-way ANOVA<br>Assume sphericity? No<br>Factor 1: Stimulus (Tria 1 E, Tria 1 S1, Tria 2 S1, Tria 2 S2)<br>Factor 2: Treatment (Ctrl, SD)<br>Tukey's multiple comparisons test | Stimulus x Treatment, F (3, 72) = 0.7382 P=0.5327<br>Stimulus, F (2.268, 54.43) = 46.98 P<0.0001<br>Treatment, F (1, 24) = 0.05691 P=0.8135<br>Subject, F (24, 72) = 3.277 P<0.0001<br>Multiple comparisons P:<br><table style="width: 100%; border: none;"> <thead> <tr> <th></th> <th style="text-align: center;">Ctrl</th> <th style="text-align: center;">SD</th> </tr> </thead> <tbody> <tr> <td>Trial 1 E vs. Trial 1 S1</td> <td style="text-align: center;">0.0003000</td> <td style="text-align: center;">0.0000935</td> </tr> <tr> <td>Trial 1 E vs. Trial 2 S1</td> <td style="text-align: center;">0.0167234</td> <td style="text-align: center;">0.1315173</td> </tr> <tr> <td>Trial 1 E vs. Trial 2 S2</td> <td style="text-align: center;">0.0013789</td> <td style="text-align: center;">0.0008299</td> </tr> <tr> <td>Trial 1 S1 vs. Trial 2 S1</td> <td style="text-align: center;">0.0025357</td> <td style="text-align: center;">0.0002826</td> </tr> <tr> <td>Trial 1 S1 vs. Trial 2 S2</td> <td style="text-align: center;">0.5348568</td> <td style="text-align: center;">0.0996259</td> </tr> <tr> <td>Trial 2 S1 vs. Trial 2 S2</td> <td style="text-align: center;">0.0111133</td> <td style="text-align: center;">0.0007321</td> </tr> </tbody> </table>                                                                                                                                                                                                                                                                                                                                                                                                       |                 | Ctrl | SD | Trial 1 E vs. Trial 1 S1 | 0.0003000 | 0.0000935 | Trial 1 E vs. Trial 2 S1 | 0.0167234 | 0.1315173 | Trial 1 E vs. Trial 2 S2 | 0.0013789 | 0.0008299 | Trial 1 S1 vs. Trial 2 S1 | 0.0025357 | 0.0002826 | Trial 1 S1 vs. Trial 2 S2 | 0.5348568 | 0.0996259 | Trial 2 S1 vs. Trial 2 S2 | 0.0111133 | 0.0007321 |                   |  |  |    |       |       |         |       |        |   |        |        |      |       |       |                                    |  |  |    |              |              |
|                                    | Ctrl                                                         | SD                                                                                                                                                                                               |                                                                                                                                                                                                                                                                                                                                                                                                                                                                                                                                                                                                                                                                                                                                                                                                                                                                                                                                                                                                                                                                                                                                                                                                                                                                                                                                                                                                                                                                                                                                                                                                                                                                                           |                 |      |    |                          |           |           |                          |           |           |                          |           |           |                           |           |           |                           |           |           |                           |           |           |                   |  |  |    |       |       |         |       |        |   |        |        |      |       |       |                                    |  |  |    |              |              |
| Trial 1 E vs. Trial 1 S1           | 0.0003000                                                    | 0.0000935                                                                                                                                                                                        |                                                                                                                                                                                                                                                                                                                                                                                                                                                                                                                                                                                                                                                                                                                                                                                                                                                                                                                                                                                                                                                                                                                                                                                                                                                                                                                                                                                                                                                                                                                                                                                                                                                                                           |                 |      |    |                          |           |           |                          |           |           |                          |           |           |                           |           |           |                           |           |           |                           |           |           |                   |  |  |    |       |       |         |       |        |   |        |        |      |       |       |                                    |  |  |    |              |              |
| Trial 1 E vs. Trial 2 S1           | 0.0167234                                                    | 0.1315173                                                                                                                                                                                        |                                                                                                                                                                                                                                                                                                                                                                                                                                                                                                                                                                                                                                                                                                                                                                                                                                                                                                                                                                                                                                                                                                                                                                                                                                                                                                                                                                                                                                                                                                                                                                                                                                                                                           |                 |      |    |                          |           |           |                          |           |           |                          |           |           |                           |           |           |                           |           |           |                           |           |           |                   |  |  |    |       |       |         |       |        |   |        |        |      |       |       |                                    |  |  |    |              |              |
| Trial 1 E vs. Trial 2 S2           | 0.0013789                                                    | 0.0008299                                                                                                                                                                                        |                                                                                                                                                                                                                                                                                                                                                                                                                                                                                                                                                                                                                                                                                                                                                                                                                                                                                                                                                                                                                                                                                                                                                                                                                                                                                                                                                                                                                                                                                                                                                                                                                                                                                           |                 |      |    |                          |           |           |                          |           |           |                          |           |           |                           |           |           |                           |           |           |                           |           |           |                   |  |  |    |       |       |         |       |        |   |        |        |      |       |       |                                    |  |  |    |              |              |
| Trial 1 S1 vs. Trial 2 S1          | 0.0025357                                                    | 0.0002826                                                                                                                                                                                        |                                                                                                                                                                                                                                                                                                                                                                                                                                                                                                                                                                                                                                                                                                                                                                                                                                                                                                                                                                                                                                                                                                                                                                                                                                                                                                                                                                                                                                                                                                                                                                                                                                                                                           |                 |      |    |                          |           |           |                          |           |           |                          |           |           |                           |           |           |                           |           |           |                           |           |           |                   |  |  |    |       |       |         |       |        |   |        |        |      |       |       |                                    |  |  |    |              |              |
| Trial 1 S1 vs. Trial 2 S2          | 0.5348568                                                    | 0.0996259                                                                                                                                                                                        |                                                                                                                                                                                                                                                                                                                                                                                                                                                                                                                                                                                                                                                                                                                                                                                                                                                                                                                                                                                                                                                                                                                                                                                                                                                                                                                                                                                                                                                                                                                                                                                                                                                                                           |                 |      |    |                          |           |           |                          |           |           |                          |           |           |                           |           |           |                           |           |           |                           |           |           |                   |  |  |    |       |       |         |       |        |   |        |        |      |       |       |                                    |  |  |    |              |              |
| Trial 2 S1 vs. Trial 2 S2          | 0.0111133                                                    | 0.0007321                                                                                                                                                                                        |                                                                                                                                                                                                                                                                                                                                                                                                                                                                                                                                                                                                                                                                                                                                                                                                                                                                                                                                                                                                                                                                                                                                                                                                                                                                                                                                                                                                                                                                                                                                                                                                                                                                                           |                 |      |    |                          |           |           |                          |           |           |                          |           |           |                           |           |           |                           |           |           |                           |           |           |                   |  |  |    |       |       |         |       |        |   |        |        |      |       |       |                                    |  |  |    |              |              |
| 1s                                 | 13 each (5 males + 8 females)                                | Unpaired t test with Welch's correction                                                                                                                                                          | t=0.9233, df=16.97, Two-tailed P = 0.3688                                                                                                                                                                                                                                                                                                                                                                                                                                                                                                                                                                                                                                                                                                                                                                                                                                                                                                                                                                                                                                                                                                                                                                                                                                                                                                                                                                                                                                                                                                                                                                                                                                                 |                 |      |    |                          |           |           |                          |           |           |                          |           |           |                           |           |           |                           |           |           |                           |           |           |                   |  |  |    |       |       |         |       |        |   |        |        |      |       |       |                                    |  |  |    |              |              |
| 1t                                 | 13 each (5 males + 8 females)                                | Unpaired t test with Welch's correction                                                                                                                                                          | t=0.2240, df=23.93, Two-tailed P = 0.8247                                                                                                                                                                                                                                                                                                                                                                                                                                                                                                                                                                                                                                                                                                                                                                                                                                                                                                                                                                                                                                                                                                                                                                                                                                                                                                                                                                                                                                                                                                                                                                                                                                                 |                 |      |    |                          |           |           |                          |           |           |                          |           |           |                           |           |           |                           |           |           |                           |           |           |                   |  |  |    |       |       |         |       |        |   |        |        |      |       |       |                                    |  |  |    |              |              |
| 2c                                 | 6 each (all males)                                           | Unpaired t test with Welch's correction                                                                                                                                                          | t = 0.7383, df = 9.324, Two-tailed P = 0.4785                                                                                                                                                                                                                                                                                                                                                                                                                                                                                                                                                                                                                                                                                                                                                                                                                                                                                                                                                                                                                                                                                                                                                                                                                                                                                                                                                                                                                                                                                                                                                                                                                                             |                 |      |    |                          |           |           |                          |           |           |                          |           |           |                           |           |           |                           |           |           |                           |           |           |                   |  |  |    |       |       |         |       |        |   |        |        |      |       |       |                                    |  |  |    |              |              |
| 2h                                 | 6 each (all males)                                           | Non-linear regression with one phase decay model                                                                                                                                                 | <table border="1" style="width: 100%; border-collapse: collapse;"> <thead> <tr> <th style="text-align: left;">Best-fit values</th> <th style="text-align: center;">Ctrl</th> <th style="text-align: center;">SD</th> </tr> </thead> <tbody> <tr> <td>Y0</td> <td style="text-align: center;">4.946</td> <td style="text-align: center;">5.633</td> </tr> <tr> <td>Plateau</td> <td style="text-align: center;">0.2968</td> <td style="text-align: center;">1.027</td> </tr> <tr> <td>K</td> <td style="text-align: center;">0.2105</td> <td style="text-align: center;">0.5490</td> </tr> <tr> <td>Half Life</td> <td style="text-align: center;">3.292</td> <td style="text-align: center;">1.262</td> </tr> <tr> <td>Tau</td> <td style="text-align: center;">4.750</td> <td style="text-align: center;">1.821</td> </tr> <tr> <td>Span</td> <td style="text-align: center;">4.649</td> <td style="text-align: center;">4.606</td> </tr> <tr> <td><b>Std. Error</b></td> <td></td> <td></td> </tr> <tr> <td>Y0</td> <td style="text-align: center;">1.578</td> <td style="text-align: center;">2.263</td> </tr> <tr> <td>Plateau</td> <td style="text-align: center;">2.025</td> <td style="text-align: center;">0.4054</td> </tr> <tr> <td>K</td> <td style="text-align: center;">0.2519</td> <td style="text-align: center;">0.3608</td> </tr> <tr> <td>Span</td> <td style="text-align: center;">1.478</td> <td style="text-align: center;">2.091</td> </tr> <tr> <td><b>95% CI (profile likelihood)</b></td> <td></td> <td></td> </tr> <tr> <td>Y0</td> <td style="text-align: center;">2.775 to ???</td> <td style="text-align: center;">2.698 to ???</td> </tr> </tbody> </table> | Best-fit values | Ctrl | SD | Y0                       | 4.946     | 5.633     | Plateau                  | 0.2968    | 1.027     | K                        | 0.2105    | 0.5490    | Half Life                 | 3.292     | 1.262     | Tau                       | 4.750     | 1.821     | Span                      | 4.649     | 4.606     | <b>Std. Error</b> |  |  | Y0 | 1.578 | 2.263 | Plateau | 2.025 | 0.4054 | K | 0.2519 | 0.3608 | Span | 1.478 | 2.091 | <b>95% CI (profile likelihood)</b> |  |  | Y0 | 2.775 to ??? | 2.698 to ??? |
| Best-fit values                    | Ctrl                                                         | SD                                                                                                                                                                                               |                                                                                                                                                                                                                                                                                                                                                                                                                                                                                                                                                                                                                                                                                                                                                                                                                                                                                                                                                                                                                                                                                                                                                                                                                                                                                                                                                                                                                                                                                                                                                                                                                                                                                           |                 |      |    |                          |           |           |                          |           |           |                          |           |           |                           |           |           |                           |           |           |                           |           |           |                   |  |  |    |       |       |         |       |        |   |        |        |      |       |       |                                    |  |  |    |              |              |
| Y0                                 | 4.946                                                        | 5.633                                                                                                                                                                                            |                                                                                                                                                                                                                                                                                                                                                                                                                                                                                                                                                                                                                                                                                                                                                                                                                                                                                                                                                                                                                                                                                                                                                                                                                                                                                                                                                                                                                                                                                                                                                                                                                                                                                           |                 |      |    |                          |           |           |                          |           |           |                          |           |           |                           |           |           |                           |           |           |                           |           |           |                   |  |  |    |       |       |         |       |        |   |        |        |      |       |       |                                    |  |  |    |              |              |
| Plateau                            | 0.2968                                                       | 1.027                                                                                                                                                                                            |                                                                                                                                                                                                                                                                                                                                                                                                                                                                                                                                                                                                                                                                                                                                                                                                                                                                                                                                                                                                                                                                                                                                                                                                                                                                                                                                                                                                                                                                                                                                                                                                                                                                                           |                 |      |    |                          |           |           |                          |           |           |                          |           |           |                           |           |           |                           |           |           |                           |           |           |                   |  |  |    |       |       |         |       |        |   |        |        |      |       |       |                                    |  |  |    |              |              |
| K                                  | 0.2105                                                       | 0.5490                                                                                                                                                                                           |                                                                                                                                                                                                                                                                                                                                                                                                                                                                                                                                                                                                                                                                                                                                                                                                                                                                                                                                                                                                                                                                                                                                                                                                                                                                                                                                                                                                                                                                                                                                                                                                                                                                                           |                 |      |    |                          |           |           |                          |           |           |                          |           |           |                           |           |           |                           |           |           |                           |           |           |                   |  |  |    |       |       |         |       |        |   |        |        |      |       |       |                                    |  |  |    |              |              |
| Half Life                          | 3.292                                                        | 1.262                                                                                                                                                                                            |                                                                                                                                                                                                                                                                                                                                                                                                                                                                                                                                                                                                                                                                                                                                                                                                                                                                                                                                                                                                                                                                                                                                                                                                                                                                                                                                                                                                                                                                                                                                                                                                                                                                                           |                 |      |    |                          |           |           |                          |           |           |                          |           |           |                           |           |           |                           |           |           |                           |           |           |                   |  |  |    |       |       |         |       |        |   |        |        |      |       |       |                                    |  |  |    |              |              |
| Tau                                | 4.750                                                        | 1.821                                                                                                                                                                                            |                                                                                                                                                                                                                                                                                                                                                                                                                                                                                                                                                                                                                                                                                                                                                                                                                                                                                                                                                                                                                                                                                                                                                                                                                                                                                                                                                                                                                                                                                                                                                                                                                                                                                           |                 |      |    |                          |           |           |                          |           |           |                          |           |           |                           |           |           |                           |           |           |                           |           |           |                   |  |  |    |       |       |         |       |        |   |        |        |      |       |       |                                    |  |  |    |              |              |
| Span                               | 4.649                                                        | 4.606                                                                                                                                                                                            |                                                                                                                                                                                                                                                                                                                                                                                                                                                                                                                                                                                                                                                                                                                                                                                                                                                                                                                                                                                                                                                                                                                                                                                                                                                                                                                                                                                                                                                                                                                                                                                                                                                                                           |                 |      |    |                          |           |           |                          |           |           |                          |           |           |                           |           |           |                           |           |           |                           |           |           |                   |  |  |    |       |       |         |       |        |   |        |        |      |       |       |                                    |  |  |    |              |              |
| <b>Std. Error</b>                  |                                                              |                                                                                                                                                                                                  |                                                                                                                                                                                                                                                                                                                                                                                                                                                                                                                                                                                                                                                                                                                                                                                                                                                                                                                                                                                                                                                                                                                                                                                                                                                                                                                                                                                                                                                                                                                                                                                                                                                                                           |                 |      |    |                          |           |           |                          |           |           |                          |           |           |                           |           |           |                           |           |           |                           |           |           |                   |  |  |    |       |       |         |       |        |   |        |        |      |       |       |                                    |  |  |    |              |              |
| Y0                                 | 1.578                                                        | 2.263                                                                                                                                                                                            |                                                                                                                                                                                                                                                                                                                                                                                                                                                                                                                                                                                                                                                                                                                                                                                                                                                                                                                                                                                                                                                                                                                                                                                                                                                                                                                                                                                                                                                                                                                                                                                                                                                                                           |                 |      |    |                          |           |           |                          |           |           |                          |           |           |                           |           |           |                           |           |           |                           |           |           |                   |  |  |    |       |       |         |       |        |   |        |        |      |       |       |                                    |  |  |    |              |              |
| Plateau                            | 2.025                                                        | 0.4054                                                                                                                                                                                           |                                                                                                                                                                                                                                                                                                                                                                                                                                                                                                                                                                                                                                                                                                                                                                                                                                                                                                                                                                                                                                                                                                                                                                                                                                                                                                                                                                                                                                                                                                                                                                                                                                                                                           |                 |      |    |                          |           |           |                          |           |           |                          |           |           |                           |           |           |                           |           |           |                           |           |           |                   |  |  |    |       |       |         |       |        |   |        |        |      |       |       |                                    |  |  |    |              |              |
| K                                  | 0.2519                                                       | 0.3608                                                                                                                                                                                           |                                                                                                                                                                                                                                                                                                                                                                                                                                                                                                                                                                                                                                                                                                                                                                                                                                                                                                                                                                                                                                                                                                                                                                                                                                                                                                                                                                                                                                                                                                                                                                                                                                                                                           |                 |      |    |                          |           |           |                          |           |           |                          |           |           |                           |           |           |                           |           |           |                           |           |           |                   |  |  |    |       |       |         |       |        |   |        |        |      |       |       |                                    |  |  |    |              |              |
| Span                               | 1.478                                                        | 2.091                                                                                                                                                                                            |                                                                                                                                                                                                                                                                                                                                                                                                                                                                                                                                                                                                                                                                                                                                                                                                                                                                                                                                                                                                                                                                                                                                                                                                                                                                                                                                                                                                                                                                                                                                                                                                                                                                                           |                 |      |    |                          |           |           |                          |           |           |                          |           |           |                           |           |           |                           |           |           |                           |           |           |                   |  |  |    |       |       |         |       |        |   |        |        |      |       |       |                                    |  |  |    |              |              |
| <b>95% CI (profile likelihood)</b> |                                                              |                                                                                                                                                                                                  |                                                                                                                                                                                                                                                                                                                                                                                                                                                                                                                                                                                                                                                                                                                                                                                                                                                                                                                                                                                                                                                                                                                                                                                                                                                                                                                                                                                                                                                                                                                                                                                                                                                                                           |                 |      |    |                          |           |           |                          |           |           |                          |           |           |                           |           |           |                           |           |           |                           |           |           |                   |  |  |    |       |       |         |       |        |   |        |        |      |       |       |                                    |  |  |    |              |              |
| Y0                                 | 2.775 to ???                                                 | 2.698 to ???                                                                                                                                                                                     |                                                                                                                                                                                                                                                                                                                                                                                                                                                                                                                                                                                                                                                                                                                                                                                                                                                                                                                                                                                                                                                                                                                                                                                                                                                                                                                                                                                                                                                                                                                                                                                                                                                                                           |                 |      |    |                          |           |           |                          |           |           |                          |           |           |                           |           |           |                           |           |           |                           |           |           |                   |  |  |    |       |       |         |       |        |   |        |        |      |       |       |                                    |  |  |    |              |              |

|                        |              |                  |
|------------------------|--------------|------------------|
| Plateau                | ??? to 1.987 | -397.2 to 1.703  |
| K                      | ???          | 0.0006019 to ??? |
| Half Life              | ???          | ???              |
| Tau                    | ???          | ???              |
| <b>Goodness of Fit</b> |              |                  |
| Degrees of Freedom     | 57           | 57               |
| R squared              | 0.1754       | 0.1958           |
| Sum of Squares         | 290.9        | 164.7            |
| Sy.x                   | 2.259        | 1.700            |

|                           |                                   |
|---------------------------|-----------------------------------|
| Null hypothesis           | One curve for all data sets       |
| Alternative hypothesis    | Different curve for each data set |
| P value                   | 0.5867                            |
| Conclusion (alpha = 0.05) | Do not reject null hypothesis     |
| Preferred model           | One curve for all data sets       |
| F (DFn, DFd)              | 0.6466 (3, 114)                   |

| <b>Best-fit values</b>             | <b>Ctrl</b>     | <b>SD</b>      |
|------------------------------------|-----------------|----------------|
| Y0                                 | 14.46           | 5.094          |
| Plateau                            | 2.664           | 1.580          |
| K                                  | 0.7422          | 0.3688         |
| Half Life                          | 0.9339          | 1.880          |
| Tau                                | 1.347           | 2.712          |
| Span                               | 11.80           | 3.514          |
| <b>Std. Error</b>                  |                 |                |
| Y0                                 | 5.971           | 1.950          |
| Plateau                            | 0.5952          | 0.7657         |
| K                                  | 0.4058          | 0.3826         |
| Span                               | 5.738           | 1.619          |
| <b>95% CI (profile likelihood)</b> |                 |                |
| Y0                                 | 7.264 to 95.86  | 2.725 to 21.88 |
| Plateau                            | 0.6041 to 3.716 | ???            |
| K                                  | 0.1876 to 2.888 | ???            |
| Half Life                          | 0.2400 to 3.696 | 0.2864 to ???  |
| Tau                                | 0.3463 to 5.331 | 0.4132 to ???  |
| <b>Goodness of Fit</b>             |                 |                |
| Degrees of Freedom                 | 57              | 57             |
| R squared                          | 0.2470          | 0.1168         |
| Sum of Squares                     | 536.3           | 245.5          |
| Sy.x                               | 3.067           | 2.076          |

|    |                    |                                                  |
|----|--------------------|--------------------------------------------------|
| 2i | 6 each (all males) | Non-linear regression with one phase decay model |
|----|--------------------|--------------------------------------------------|

|    |                    |                                                  |                                    |                                   |                |                        |                                   |  |
|----|--------------------|--------------------------------------------------|------------------------------------|-----------------------------------|----------------|------------------------|-----------------------------------|--|
|    |                    |                                                  | Null hypothesis                    | One curve for all data sets       |                |                        |                                   |  |
|    |                    |                                                  | Alternative hypothesis             | Different curve for each data set |                |                        |                                   |  |
|    |                    |                                                  | P value                            | 0.0057                            |                |                        |                                   |  |
|    |                    |                                                  | Conclusion (alpha = 0.05)          | Reject null hypothesis            |                |                        |                                   |  |
|    |                    |                                                  | Preferred model                    | Different curve for each data set |                |                        |                                   |  |
|    |                    |                                                  | F (DFn, DFd)                       | 4.408 (3, 114)                    |                |                        |                                   |  |
| 2j | 6 each (all males) | Non-linear regression with one phase decay model | <b>Best-fit values</b>             |                                   |                | <b>Ctrl</b>            | <b>SD</b>                         |  |
|    |                    |                                                  | Y0                                 |                                   | 2.262          | 0.7416                 |                                   |  |
|    |                    |                                                  | Plateau                            |                                   | 1.915          | ~ 24.53                |                                   |  |
|    |                    |                                                  | K                                  |                                   | 0.2838         | ~ 0.001642             |                                   |  |
|    |                    |                                                  | Half Life                          |                                   | 2.442          | ~ 422.2                |                                   |  |
|    |                    |                                                  | Tau                                |                                   | 3.524          | ~ 609.1                |                                   |  |
|    |                    |                                                  | Span                               |                                   | 0.3464         | ~ -23.78               |                                   |  |
|    |                    |                                                  | <b>Std. Error</b>                  |                                   |                |                        |                                   |  |
|    |                    |                                                  | Y0                                 |                                   | 1.861          | 0.6515                 |                                   |  |
|    |                    |                                                  | Plateau                            |                                   | 1.325          | ~ 17836                |                                   |  |
|    |                    |                                                  | K                                  |                                   | 3.816          | ~ 1.242                |                                   |  |
|    |                    |                                                  | Span                               |                                   | 1.437          | ~ 17835                |                                   |  |
|    |                    |                                                  | <b>95% CI (profile likelihood)</b> |                                   |                |                        |                                   |  |
|    |                    |                                                  | Y0                                 |                                   | 1.406 to ???   | ???                    |                                   |  |
|    |                    |                                                  | Plateau                            |                                   | 1.406 to 2.633 | (Very wide)            |                                   |  |
|    |                    |                                                  | K                                  |                                   | ???            | (Very wide)            |                                   |  |
|    |                    |                                                  | Half Life                          |                                   | ???            | (Very wide)            |                                   |  |
|    |                    |                                                  | Tau                                |                                   | ???            | (Very wide)            |                                   |  |
|    |                    |                                                  | <b>Goodness of Fit</b>             |                                   |                |                        |                                   |  |
|    |                    |                                                  | Degrees of Freedom                 |                                   | 53             | 57                     |                                   |  |
|    |                    |                                                  | R squared                          |                                   | 0.001159       | 0.007079               |                                   |  |
|    |                    |                                                  | Sum of Squares                     |                                   | 282.0          | 104.4                  |                                   |  |
|    |                    |                                                  | Sy.x                               |                                   | 2.307          | 1.353                  |                                   |  |
|    |                    |                                                  |                                    |                                   |                |                        |                                   |  |
|    |                    |                                                  |                                    |                                   |                | Null hypothesis        | One curve for all data sets       |  |
|    |                    |                                                  |                                    |                                   |                | Alternative hypothesis | Different curve for each data set |  |
|    |                    |                                                  |                                    |                                   |                | P value                | Can't calculate                   |  |
|    |                    |                                                  | Conclusion (alpha = 0.05)          | Both fits are ambiguous           |                |                        |                                   |  |
|    |                    |                                                  | Preferred model                    | One curve for all data sets       |                |                        |                                   |  |
|    |                    |                                                  | F (DFn, DFd)                       | Can't calculate                   |                |                        |                                   |  |
| 2k | 6 each (all males) | Non-linear regression with one phase decay model | <b>Best-fit values</b>             |                                   |                | <b>Ctrl</b>            | <b>SD</b>                         |  |
|    |                    |                                                  | Y0                                 |                                   | 22.18          | 2.687                  |                                   |  |
|    |                    |                                                  | Plateau                            |                                   | 2.400          | 1.287                  |                                   |  |
|    |                    |                                                  | K                                  |                                   | 1.511          | 0.4159                 |                                   |  |
|    |                    |                                                  | Half Life                          |                                   | 0.4586         | 1.667                  |                                   |  |
|    |                    |                                                  | Tau                                |                                   | 0.6616         | 2.404                  |                                   |  |
|    |                    |                                                  | Span                               |                                   | 19.78          | 1.400                  |                                   |  |
|    |                    |                                                  | <b>Std. Error</b>                  |                                   |                |                        |                                   |  |

|                                    |                                                            |                                                                                                                                                                                                                                                                                                            | <table border="1"> <tbody> <tr> <td>Y0</td> <td>24.06</td> <td>2.100</td> </tr> <tr> <td>Plateau</td> <td>0.4366</td> <td>0.6616</td> </tr> <tr> <td>K</td> <td>1.173</td> <td>1.053</td> </tr> <tr> <td>Span</td> <td>23.90</td> <td>1.807</td> </tr> <tr> <td colspan="3"><b>95% CI (profile likelihood)</b></td> </tr> <tr> <td>Y0</td> <td>6.889 to ???</td> <td>1.110 to ???</td> </tr> <tr> <td>Plateau</td> <td>1.495 to 3.231</td> <td>1.110 to 2.007</td> </tr> <tr> <td>K</td> <td>0.4608 to ???</td> <td>???</td> </tr> <tr> <td>Half Life</td> <td>??? to 1.504</td> <td>???</td> </tr> <tr> <td>Tau</td> <td>??? to 2.170</td> <td>???</td> </tr> <tr> <td colspan="3"><b>Goodness of Fit</b></td> </tr> <tr> <td>Degrees of Freedom</td> <td>53</td> <td>56</td> </tr> <tr> <td>R squared</td> <td>0.2100</td> <td>0.01998</td> </tr> <tr> <td>Sum of Squares</td> <td>376.0</td> <td>231.3</td> </tr> <tr> <td>Sy.x</td> <td>2.664</td> <td>2.032</td> </tr> </tbody> </table> <table border="1"> <tbody> <tr> <td>Null hypothesis</td> <td>One curve for all data sets</td> </tr> <tr> <td>Alternative hypothesis</td> <td>Different curve for each data set</td> </tr> <tr> <td>P value</td> <td>0.0013</td> </tr> <tr> <td>Conclusion (alpha = 0.05)</td> <td>Reject null hypothesis</td> </tr> <tr> <td>Preferred model</td> <td>Different curve for each data set</td> </tr> <tr> <td>F (DFn, DFd)</td> <td>5.630 (3, 109)</td> </tr> </tbody> </table> | Y0              | 24.06 | 2.100 | Plateau                  | 0.4366 | 0.6616 | K                        | 1.173  | 1.053  | Span                     | 23.90  | 1.807  | <b>95% CI (profile likelihood)</b> |        |        | Y0                        | 6.889 to ??? | 1.110 to ??? | Plateau                   | 1.495 to 3.231 | 1.110 to 2.007 | K | 0.4608 to ??? | ???         | Half Life   | ??? to 1.504 | ???         | Tau     | ??? to 2.170 | ???     | <b>Goodness of Fit</b> |  |  | Degrees of Freedom | 53 | 56 | R squared | 0.2100 | 0.01998 | Sum of Squares | 376.0 | 231.3 | Sy.x | 2.664 | 2.032 | Null hypothesis | One curve for all data sets | Alternative hypothesis | Different curve for each data set | P value | 0.0013 | Conclusion (alpha = 0.05) | Reject null hypothesis | Preferred model | Different curve for each data set | F (DFn, DFd) | 5.630 (3, 109) |
|------------------------------------|------------------------------------------------------------|------------------------------------------------------------------------------------------------------------------------------------------------------------------------------------------------------------------------------------------------------------------------------------------------------------|-----------------------------------------------------------------------------------------------------------------------------------------------------------------------------------------------------------------------------------------------------------------------------------------------------------------------------------------------------------------------------------------------------------------------------------------------------------------------------------------------------------------------------------------------------------------------------------------------------------------------------------------------------------------------------------------------------------------------------------------------------------------------------------------------------------------------------------------------------------------------------------------------------------------------------------------------------------------------------------------------------------------------------------------------------------------------------------------------------------------------------------------------------------------------------------------------------------------------------------------------------------------------------------------------------------------------------------------------------------------------------------------------------------------------------------------------------------------------------|-----------------|-------|-------|--------------------------|--------|--------|--------------------------|--------|--------|--------------------------|--------|--------|------------------------------------|--------|--------|---------------------------|--------------|--------------|---------------------------|----------------|----------------|---|---------------|-------------|-------------|--------------|-------------|---------|--------------|---------|------------------------|--|--|--------------------|----|----|-----------|--------|---------|----------------|-------|-------|------|-------|-------|-----------------|-----------------------------|------------------------|-----------------------------------|---------|--------|---------------------------|------------------------|-----------------|-----------------------------------|--------------|----------------|
| Y0                                 | 24.06                                                      | 2.100                                                                                                                                                                                                                                                                                                      |                                                                                                                                                                                                                                                                                                                                                                                                                                                                                                                                                                                                                                                                                                                                                                                                                                                                                                                                                                                                                                                                                                                                                                                                                                                                                                                                                                                                                                                                             |                 |       |       |                          |        |        |                          |        |        |                          |        |        |                                    |        |        |                           |              |              |                           |                |                |   |               |             |             |              |             |         |              |         |                        |  |  |                    |    |    |           |        |         |                |       |       |      |       |       |                 |                             |                        |                                   |         |        |                           |                        |                 |                                   |              |                |
| Plateau                            | 0.4366                                                     | 0.6616                                                                                                                                                                                                                                                                                                     |                                                                                                                                                                                                                                                                                                                                                                                                                                                                                                                                                                                                                                                                                                                                                                                                                                                                                                                                                                                                                                                                                                                                                                                                                                                                                                                                                                                                                                                                             |                 |       |       |                          |        |        |                          |        |        |                          |        |        |                                    |        |        |                           |              |              |                           |                |                |   |               |             |             |              |             |         |              |         |                        |  |  |                    |    |    |           |        |         |                |       |       |      |       |       |                 |                             |                        |                                   |         |        |                           |                        |                 |                                   |              |                |
| K                                  | 1.173                                                      | 1.053                                                                                                                                                                                                                                                                                                      |                                                                                                                                                                                                                                                                                                                                                                                                                                                                                                                                                                                                                                                                                                                                                                                                                                                                                                                                                                                                                                                                                                                                                                                                                                                                                                                                                                                                                                                                             |                 |       |       |                          |        |        |                          |        |        |                          |        |        |                                    |        |        |                           |              |              |                           |                |                |   |               |             |             |              |             |         |              |         |                        |  |  |                    |    |    |           |        |         |                |       |       |      |       |       |                 |                             |                        |                                   |         |        |                           |                        |                 |                                   |              |                |
| Span                               | 23.90                                                      | 1.807                                                                                                                                                                                                                                                                                                      |                                                                                                                                                                                                                                                                                                                                                                                                                                                                                                                                                                                                                                                                                                                                                                                                                                                                                                                                                                                                                                                                                                                                                                                                                                                                                                                                                                                                                                                                             |                 |       |       |                          |        |        |                          |        |        |                          |        |        |                                    |        |        |                           |              |              |                           |                |                |   |               |             |             |              |             |         |              |         |                        |  |  |                    |    |    |           |        |         |                |       |       |      |       |       |                 |                             |                        |                                   |         |        |                           |                        |                 |                                   |              |                |
| <b>95% CI (profile likelihood)</b> |                                                            |                                                                                                                                                                                                                                                                                                            |                                                                                                                                                                                                                                                                                                                                                                                                                                                                                                                                                                                                                                                                                                                                                                                                                                                                                                                                                                                                                                                                                                                                                                                                                                                                                                                                                                                                                                                                             |                 |       |       |                          |        |        |                          |        |        |                          |        |        |                                    |        |        |                           |              |              |                           |                |                |   |               |             |             |              |             |         |              |         |                        |  |  |                    |    |    |           |        |         |                |       |       |      |       |       |                 |                             |                        |                                   |         |        |                           |                        |                 |                                   |              |                |
| Y0                                 | 6.889 to ???                                               | 1.110 to ???                                                                                                                                                                                                                                                                                               |                                                                                                                                                                                                                                                                                                                                                                                                                                                                                                                                                                                                                                                                                                                                                                                                                                                                                                                                                                                                                                                                                                                                                                                                                                                                                                                                                                                                                                                                             |                 |       |       |                          |        |        |                          |        |        |                          |        |        |                                    |        |        |                           |              |              |                           |                |                |   |               |             |             |              |             |         |              |         |                        |  |  |                    |    |    |           |        |         |                |       |       |      |       |       |                 |                             |                        |                                   |         |        |                           |                        |                 |                                   |              |                |
| Plateau                            | 1.495 to 3.231                                             | 1.110 to 2.007                                                                                                                                                                                                                                                                                             |                                                                                                                                                                                                                                                                                                                                                                                                                                                                                                                                                                                                                                                                                                                                                                                                                                                                                                                                                                                                                                                                                                                                                                                                                                                                                                                                                                                                                                                                             |                 |       |       |                          |        |        |                          |        |        |                          |        |        |                                    |        |        |                           |              |              |                           |                |                |   |               |             |             |              |             |         |              |         |                        |  |  |                    |    |    |           |        |         |                |       |       |      |       |       |                 |                             |                        |                                   |         |        |                           |                        |                 |                                   |              |                |
| K                                  | 0.4608 to ???                                              | ???                                                                                                                                                                                                                                                                                                        |                                                                                                                                                                                                                                                                                                                                                                                                                                                                                                                                                                                                                                                                                                                                                                                                                                                                                                                                                                                                                                                                                                                                                                                                                                                                                                                                                                                                                                                                             |                 |       |       |                          |        |        |                          |        |        |                          |        |        |                                    |        |        |                           |              |              |                           |                |                |   |               |             |             |              |             |         |              |         |                        |  |  |                    |    |    |           |        |         |                |       |       |      |       |       |                 |                             |                        |                                   |         |        |                           |                        |                 |                                   |              |                |
| Half Life                          | ??? to 1.504                                               | ???                                                                                                                                                                                                                                                                                                        |                                                                                                                                                                                                                                                                                                                                                                                                                                                                                                                                                                                                                                                                                                                                                                                                                                                                                                                                                                                                                                                                                                                                                                                                                                                                                                                                                                                                                                                                             |                 |       |       |                          |        |        |                          |        |        |                          |        |        |                                    |        |        |                           |              |              |                           |                |                |   |               |             |             |              |             |         |              |         |                        |  |  |                    |    |    |           |        |         |                |       |       |      |       |       |                 |                             |                        |                                   |         |        |                           |                        |                 |                                   |              |                |
| Tau                                | ??? to 2.170                                               | ???                                                                                                                                                                                                                                                                                                        |                                                                                                                                                                                                                                                                                                                                                                                                                                                                                                                                                                                                                                                                                                                                                                                                                                                                                                                                                                                                                                                                                                                                                                                                                                                                                                                                                                                                                                                                             |                 |       |       |                          |        |        |                          |        |        |                          |        |        |                                    |        |        |                           |              |              |                           |                |                |   |               |             |             |              |             |         |              |         |                        |  |  |                    |    |    |           |        |         |                |       |       |      |       |       |                 |                             |                        |                                   |         |        |                           |                        |                 |                                   |              |                |
| <b>Goodness of Fit</b>             |                                                            |                                                                                                                                                                                                                                                                                                            |                                                                                                                                                                                                                                                                                                                                                                                                                                                                                                                                                                                                                                                                                                                                                                                                                                                                                                                                                                                                                                                                                                                                                                                                                                                                                                                                                                                                                                                                             |                 |       |       |                          |        |        |                          |        |        |                          |        |        |                                    |        |        |                           |              |              |                           |                |                |   |               |             |             |              |             |         |              |         |                        |  |  |                    |    |    |           |        |         |                |       |       |      |       |       |                 |                             |                        |                                   |         |        |                           |                        |                 |                                   |              |                |
| Degrees of Freedom                 | 53                                                         | 56                                                                                                                                                                                                                                                                                                         |                                                                                                                                                                                                                                                                                                                                                                                                                                                                                                                                                                                                                                                                                                                                                                                                                                                                                                                                                                                                                                                                                                                                                                                                                                                                                                                                                                                                                                                                             |                 |       |       |                          |        |        |                          |        |        |                          |        |        |                                    |        |        |                           |              |              |                           |                |                |   |               |             |             |              |             |         |              |         |                        |  |  |                    |    |    |           |        |         |                |       |       |      |       |       |                 |                             |                        |                                   |         |        |                           |                        |                 |                                   |              |                |
| R squared                          | 0.2100                                                     | 0.01998                                                                                                                                                                                                                                                                                                    |                                                                                                                                                                                                                                                                                                                                                                                                                                                                                                                                                                                                                                                                                                                                                                                                                                                                                                                                                                                                                                                                                                                                                                                                                                                                                                                                                                                                                                                                             |                 |       |       |                          |        |        |                          |        |        |                          |        |        |                                    |        |        |                           |              |              |                           |                |                |   |               |             |             |              |             |         |              |         |                        |  |  |                    |    |    |           |        |         |                |       |       |      |       |       |                 |                             |                        |                                   |         |        |                           |                        |                 |                                   |              |                |
| Sum of Squares                     | 376.0                                                      | 231.3                                                                                                                                                                                                                                                                                                      |                                                                                                                                                                                                                                                                                                                                                                                                                                                                                                                                                                                                                                                                                                                                                                                                                                                                                                                                                                                                                                                                                                                                                                                                                                                                                                                                                                                                                                                                             |                 |       |       |                          |        |        |                          |        |        |                          |        |        |                                    |        |        |                           |              |              |                           |                |                |   |               |             |             |              |             |         |              |         |                        |  |  |                    |    |    |           |        |         |                |       |       |      |       |       |                 |                             |                        |                                   |         |        |                           |                        |                 |                                   |              |                |
| Sy.x                               | 2.664                                                      | 2.032                                                                                                                                                                                                                                                                                                      |                                                                                                                                                                                                                                                                                                                                                                                                                                                                                                                                                                                                                                                                                                                                                                                                                                                                                                                                                                                                                                                                                                                                                                                                                                                                                                                                                                                                                                                                             |                 |       |       |                          |        |        |                          |        |        |                          |        |        |                                    |        |        |                           |              |              |                           |                |                |   |               |             |             |              |             |         |              |         |                        |  |  |                    |    |    |           |        |         |                |       |       |      |       |       |                 |                             |                        |                                   |         |        |                           |                        |                 |                                   |              |                |
| Null hypothesis                    | One curve for all data sets                                |                                                                                                                                                                                                                                                                                                            |                                                                                                                                                                                                                                                                                                                                                                                                                                                                                                                                                                                                                                                                                                                                                                                                                                                                                                                                                                                                                                                                                                                                                                                                                                                                                                                                                                                                                                                                             |                 |       |       |                          |        |        |                          |        |        |                          |        |        |                                    |        |        |                           |              |              |                           |                |                |   |               |             |             |              |             |         |              |         |                        |  |  |                    |    |    |           |        |         |                |       |       |      |       |       |                 |                             |                        |                                   |         |        |                           |                        |                 |                                   |              |                |
| Alternative hypothesis             | Different curve for each data set                          |                                                                                                                                                                                                                                                                                                            |                                                                                                                                                                                                                                                                                                                                                                                                                                                                                                                                                                                                                                                                                                                                                                                                                                                                                                                                                                                                                                                                                                                                                                                                                                                                                                                                                                                                                                                                             |                 |       |       |                          |        |        |                          |        |        |                          |        |        |                                    |        |        |                           |              |              |                           |                |                |   |               |             |             |              |             |         |              |         |                        |  |  |                    |    |    |           |        |         |                |       |       |      |       |       |                 |                             |                        |                                   |         |        |                           |                        |                 |                                   |              |                |
| P value                            | 0.0013                                                     |                                                                                                                                                                                                                                                                                                            |                                                                                                                                                                                                                                                                                                                                                                                                                                                                                                                                                                                                                                                                                                                                                                                                                                                                                                                                                                                                                                                                                                                                                                                                                                                                                                                                                                                                                                                                             |                 |       |       |                          |        |        |                          |        |        |                          |        |        |                                    |        |        |                           |              |              |                           |                |                |   |               |             |             |              |             |         |              |         |                        |  |  |                    |    |    |           |        |         |                |       |       |      |       |       |                 |                             |                        |                                   |         |        |                           |                        |                 |                                   |              |                |
| Conclusion (alpha = 0.05)          | Reject null hypothesis                                     |                                                                                                                                                                                                                                                                                                            |                                                                                                                                                                                                                                                                                                                                                                                                                                                                                                                                                                                                                                                                                                                                                                                                                                                                                                                                                                                                                                                                                                                                                                                                                                                                                                                                                                                                                                                                             |                 |       |       |                          |        |        |                          |        |        |                          |        |        |                                    |        |        |                           |              |              |                           |                |                |   |               |             |             |              |             |         |              |         |                        |  |  |                    |    |    |           |        |         |                |       |       |      |       |       |                 |                             |                        |                                   |         |        |                           |                        |                 |                                   |              |                |
| Preferred model                    | Different curve for each data set                          |                                                                                                                                                                                                                                                                                                            |                                                                                                                                                                                                                                                                                                                                                                                                                                                                                                                                                                                                                                                                                                                                                                                                                                                                                                                                                                                                                                                                                                                                                                                                                                                                                                                                                                                                                                                                             |                 |       |       |                          |        |        |                          |        |        |                          |        |        |                                    |        |        |                           |              |              |                           |                |                |   |               |             |             |              |             |         |              |         |                        |  |  |                    |    |    |           |        |         |                |       |       |      |       |       |                 |                             |                        |                                   |         |        |                           |                        |                 |                                   |              |                |
| F (DFn, DFd)                       | 5.630 (3, 109)                                             |                                                                                                                                                                                                                                                                                                            |                                                                                                                                                                                                                                                                                                                                                                                                                                                                                                                                                                                                                                                                                                                                                                                                                                                                                                                                                                                                                                                                                                                                                                                                                                                                                                                                                                                                                                                                             |                 |       |       |                          |        |        |                          |        |        |                          |        |        |                                    |        |        |                           |              |              |                           |                |                |   |               |             |             |              |             |         |              |         |                        |  |  |                    |    |    |           |        |         |                |       |       |      |       |       |                 |                             |                        |                                   |         |        |                           |                        |                 |                                   |              |                |
| 2l                                 | 6 each (all males)                                         | <p>Repeated-measure two-way ANOVA<br/>Assume sphericity?<br/>Yes<br/>Factor 1: Stimulus (Tria 1 E, Tria 1 S1, Tria 2 S1, Tria 2 S2)<br/>Factor 2: Treatment (Ctrl, SD)<br/>Tukey's multiple comparisons test (for comparison within group)<br/>Bonferroni's multiple comparisons test (for Ctrl vs SD)</p> | <p>Treatment x Stimulus, <math>F(3, 30) = 2.251</math> <math>P=0.1028</math><br/>Treatment, <math>F(1, 10) = 19.27</math> <math>P=0.0014</math><br/>Stimulus, <math>F(3, 30) = 3.451</math> <math>P=0.0288</math><br/>Subject, <math>F(10, 30) = 0.8019</math> <math>P=0.6281</math></p> <p>Multiple comparisons P:</p> <table border="1"> <thead> <tr> <th></th> <th>Ctrl</th> <th>SD</th> </tr> </thead> <tbody> <tr> <td>Trial 1 E vs. Trial 1 S1</td> <td>0.1095</td> <td>0.9966</td> </tr> <tr> <td>Trial 1 E vs. Trial 2 S1</td> <td>0.9426</td> <td>0.7551</td> </tr> <tr> <td>Trial 1 E vs. Trial 2 S2</td> <td>0.0746</td> <td>0.9016</td> </tr> <tr> <td>Trial 1 S1 vs. Trial 2 S1</td> <td>0.0323</td> <td>0.6292</td> </tr> <tr> <td>Trial 1 S1 vs. Trial 2 S2</td> <td>0.9977</td> <td>0.8059</td> </tr> <tr> <td>Trial 2 S1 vs. Trial 2 S2</td> <td>0.0208</td> <td>0.9899</td> </tr> </tbody> </table> <table border="1"> <thead> <tr> <th></th> <th>Trial 1, E</th> <th>Trial 1, S1</th> <th>Trial 2, S1</th> <th>Trial 2, S2</th> </tr> </thead> <tbody> <tr> <td>Ctrl vs. SD</td> <td>&gt;0.9999</td> <td>0.0381</td> <td>&gt;0.9999</td> <td>0.0017</td> </tr> </tbody> </table>                                                                                                                                                                                                                                                                         |                 | Ctrl  | SD    | Trial 1 E vs. Trial 1 S1 | 0.1095 | 0.9966 | Trial 1 E vs. Trial 2 S1 | 0.9426 | 0.7551 | Trial 1 E vs. Trial 2 S2 | 0.0746 | 0.9016 | Trial 1 S1 vs. Trial 2 S1          | 0.0323 | 0.6292 | Trial 1 S1 vs. Trial 2 S2 | 0.9977       | 0.8059       | Trial 2 S1 vs. Trial 2 S2 | 0.0208         | 0.9899         |   | Trial 1, E    | Trial 1, S1 | Trial 2, S1 | Trial 2, S2  | Ctrl vs. SD | >0.9999 | 0.0381       | >0.9999 | 0.0017                 |  |  |                    |    |    |           |        |         |                |       |       |      |       |       |                 |                             |                        |                                   |         |        |                           |                        |                 |                                   |              |                |
|                                    | Ctrl                                                       | SD                                                                                                                                                                                                                                                                                                         |                                                                                                                                                                                                                                                                                                                                                                                                                                                                                                                                                                                                                                                                                                                                                                                                                                                                                                                                                                                                                                                                                                                                                                                                                                                                                                                                                                                                                                                                             |                 |       |       |                          |        |        |                          |        |        |                          |        |        |                                    |        |        |                           |              |              |                           |                |                |   |               |             |             |              |             |         |              |         |                        |  |  |                    |    |    |           |        |         |                |       |       |      |       |       |                 |                             |                        |                                   |         |        |                           |                        |                 |                                   |              |                |
| Trial 1 E vs. Trial 1 S1           | 0.1095                                                     | 0.9966                                                                                                                                                                                                                                                                                                     |                                                                                                                                                                                                                                                                                                                                                                                                                                                                                                                                                                                                                                                                                                                                                                                                                                                                                                                                                                                                                                                                                                                                                                                                                                                                                                                                                                                                                                                                             |                 |       |       |                          |        |        |                          |        |        |                          |        |        |                                    |        |        |                           |              |              |                           |                |                |   |               |             |             |              |             |         |              |         |                        |  |  |                    |    |    |           |        |         |                |       |       |      |       |       |                 |                             |                        |                                   |         |        |                           |                        |                 |                                   |              |                |
| Trial 1 E vs. Trial 2 S1           | 0.9426                                                     | 0.7551                                                                                                                                                                                                                                                                                                     |                                                                                                                                                                                                                                                                                                                                                                                                                                                                                                                                                                                                                                                                                                                                                                                                                                                                                                                                                                                                                                                                                                                                                                                                                                                                                                                                                                                                                                                                             |                 |       |       |                          |        |        |                          |        |        |                          |        |        |                                    |        |        |                           |              |              |                           |                |                |   |               |             |             |              |             |         |              |         |                        |  |  |                    |    |    |           |        |         |                |       |       |      |       |       |                 |                             |                        |                                   |         |        |                           |                        |                 |                                   |              |                |
| Trial 1 E vs. Trial 2 S2           | 0.0746                                                     | 0.9016                                                                                                                                                                                                                                                                                                     |                                                                                                                                                                                                                                                                                                                                                                                                                                                                                                                                                                                                                                                                                                                                                                                                                                                                                                                                                                                                                                                                                                                                                                                                                                                                                                                                                                                                                                                                             |                 |       |       |                          |        |        |                          |        |        |                          |        |        |                                    |        |        |                           |              |              |                           |                |                |   |               |             |             |              |             |         |              |         |                        |  |  |                    |    |    |           |        |         |                |       |       |      |       |       |                 |                             |                        |                                   |         |        |                           |                        |                 |                                   |              |                |
| Trial 1 S1 vs. Trial 2 S1          | 0.0323                                                     | 0.6292                                                                                                                                                                                                                                                                                                     |                                                                                                                                                                                                                                                                                                                                                                                                                                                                                                                                                                                                                                                                                                                                                                                                                                                                                                                                                                                                                                                                                                                                                                                                                                                                                                                                                                                                                                                                             |                 |       |       |                          |        |        |                          |        |        |                          |        |        |                                    |        |        |                           |              |              |                           |                |                |   |               |             |             |              |             |         |              |         |                        |  |  |                    |    |    |           |        |         |                |       |       |      |       |       |                 |                             |                        |                                   |         |        |                           |                        |                 |                                   |              |                |
| Trial 1 S1 vs. Trial 2 S2          | 0.9977                                                     | 0.8059                                                                                                                                                                                                                                                                                                     |                                                                                                                                                                                                                                                                                                                                                                                                                                                                                                                                                                                                                                                                                                                                                                                                                                                                                                                                                                                                                                                                                                                                                                                                                                                                                                                                                                                                                                                                             |                 |       |       |                          |        |        |                          |        |        |                          |        |        |                                    |        |        |                           |              |              |                           |                |                |   |               |             |             |              |             |         |              |         |                        |  |  |                    |    |    |           |        |         |                |       |       |      |       |       |                 |                             |                        |                                   |         |        |                           |                        |                 |                                   |              |                |
| Trial 2 S1 vs. Trial 2 S2          | 0.0208                                                     | 0.9899                                                                                                                                                                                                                                                                                                     |                                                                                                                                                                                                                                                                                                                                                                                                                                                                                                                                                                                                                                                                                                                                                                                                                                                                                                                                                                                                                                                                                                                                                                                                                                                                                                                                                                                                                                                                             |                 |       |       |                          |        |        |                          |        |        |                          |        |        |                                    |        |        |                           |              |              |                           |                |                |   |               |             |             |              |             |         |              |         |                        |  |  |                    |    |    |           |        |         |                |       |       |      |       |       |                 |                             |                        |                                   |         |        |                           |                        |                 |                                   |              |                |
|                                    | Trial 1, E                                                 | Trial 1, S1                                                                                                                                                                                                                                                                                                | Trial 2, S1                                                                                                                                                                                                                                                                                                                                                                                                                                                                                                                                                                                                                                                                                                                                                                                                                                                                                                                                                                                                                                                                                                                                                                                                                                                                                                                                                                                                                                                                 | Trial 2, S2     |       |       |                          |        |        |                          |        |        |                          |        |        |                                    |        |        |                           |              |              |                           |                |                |   |               |             |             |              |             |         |              |         |                        |  |  |                    |    |    |           |        |         |                |       |       |      |       |       |                 |                             |                        |                                   |         |        |                           |                        |                 |                                   |              |                |
| Ctrl vs. SD                        | >0.9999                                                    | 0.0381                                                                                                                                                                                                                                                                                                     | >0.9999                                                                                                                                                                                                                                                                                                                                                                                                                                                                                                                                                                                                                                                                                                                                                                                                                                                                                                                                                                                                                                                                                                                                                                                                                                                                                                                                                                                                                                                                     | 0.0017          |       |       |                          |        |        |                          |        |        |                          |        |        |                                    |        |        |                           |              |              |                           |                |                |   |               |             |             |              |             |         |              |         |                        |  |  |                    |    |    |           |        |         |                |       |       |      |       |       |                 |                             |                        |                                   |         |        |                           |                        |                 |                                   |              |                |
| 2n                                 | 6 each (all males)                                         | Mann-Whitney test                                                                                                                                                                                                                                                                                          | Mann-Whitney $U = 2$ , Two-tailed $P = 0.0087$                                                                                                                                                                                                                                                                                                                                                                                                                                                                                                                                                                                                                                                                                                                                                                                                                                                                                                                                                                                                                                                                                                                                                                                                                                                                                                                                                                                                                              |                 |       |       |                          |        |        |                          |        |        |                          |        |        |                                    |        |        |                           |              |              |                           |                |                |   |               |             |             |              |             |         |              |         |                        |  |  |                    |    |    |           |        |         |                |       |       |      |       |       |                 |                             |                        |                                   |         |        |                           |                        |                 |                                   |              |                |
| 2o                                 | 6 each (all males)                                         | Mann-Whitney test                                                                                                                                                                                                                                                                                          | Mann-Whitney $U = 5$ , Two-tailed $P = 0.0411$                                                                                                                                                                                                                                                                                                                                                                                                                                                                                                                                                                                                                                                                                                                                                                                                                                                                                                                                                                                                                                                                                                                                                                                                                                                                                                                                                                                                                              |                 |       |       |                          |        |        |                          |        |        |                          |        |        |                                    |        |        |                           |              |              |                           |                |                |   |               |             |             |              |             |         |              |         |                        |  |  |                    |    |    |           |        |         |                |       |       |      |       |       |                 |                             |                        |                                   |         |        |                           |                        |                 |                                   |              |                |
| 2p                                 | 6 each (all males)                                         | Unpaired t test with Welch's correction                                                                                                                                                                                                                                                                    | $t=2.471$ , $df=7.766$ , Two-tailed $P = 0.0395$                                                                                                                                                                                                                                                                                                                                                                                                                                                                                                                                                                                                                                                                                                                                                                                                                                                                                                                                                                                                                                                                                                                                                                                                                                                                                                                                                                                                                            |                 |       |       |                          |        |        |                          |        |        |                          |        |        |                                    |        |        |                           |              |              |                           |                |                |   |               |             |             |              |             |         |              |         |                        |  |  |                    |    |    |           |        |         |                |       |       |      |       |       |                 |                             |                        |                                   |         |        |                           |                        |                 |                                   |              |                |
| 2q                                 | 6 each (all males)                                         | Unpaired t test with Welch's correction                                                                                                                                                                                                                                                                    | $t=1.432$ , $df=7.818$ , Two-tailed $P = 0.1910$                                                                                                                                                                                                                                                                                                                                                                                                                                                                                                                                                                                                                                                                                                                                                                                                                                                                                                                                                                                                                                                                                                                                                                                                                                                                                                                                                                                                                            |                 |       |       |                          |        |        |                          |        |        |                          |        |        |                                    |        |        |                           |              |              |                           |                |                |   |               |             |             |              |             |         |              |         |                        |  |  |                    |    |    |           |        |         |                |       |       |      |       |       |                 |                             |                        |                                   |         |        |                           |                        |                 |                                   |              |                |
| 3g                                 | Ctrl: 7 (4 males + 3 females); SD: 6 (3 males + 3 females) | Non-linear regression with one phase decay model                                                                                                                                                                                                                                                           | <table border="1"> <thead> <tr> <th>Best-fit values</th> <th>Ctrl</th> <th>SD</th> </tr> </thead> <tbody> <tr> <td>Y0</td> <td>2.004</td> <td>7.883</td> </tr> <tr> <td>Plateau</td> <td>0.7699</td> <td>0.4145</td> </tr> <tr> <td>K</td> <td>0.3351</td> <td>1.289</td> </tr> </tbody> </table>                                                                                                                                                                                                                                                                                                                                                                                                                                                                                                                                                                                                                                                                                                                                                                                                                                                                                                                                                                                                                                                                                                                                                                           | Best-fit values | Ctrl  | SD    | Y0                       | 2.004  | 7.883  | Plateau                  | 0.7699 | 0.4145 | K                        | 0.3351 | 1.289  |                                    |        |        |                           |              |              |                           |                |                |   |               |             |             |              |             |         |              |         |                        |  |  |                    |    |    |           |        |         |                |       |       |      |       |       |                 |                             |                        |                                   |         |        |                           |                        |                 |                                   |              |                |
| Best-fit values                    | Ctrl                                                       | SD                                                                                                                                                                                                                                                                                                         |                                                                                                                                                                                                                                                                                                                                                                                                                                                                                                                                                                                                                                                                                                                                                                                                                                                                                                                                                                                                                                                                                                                                                                                                                                                                                                                                                                                                                                                                             |                 |       |       |                          |        |        |                          |        |        |                          |        |        |                                    |        |        |                           |              |              |                           |                |                |   |               |             |             |              |             |         |              |         |                        |  |  |                    |    |    |           |        |         |                |       |       |      |       |       |                 |                             |                        |                                   |         |        |                           |                        |                 |                                   |              |                |
| Y0                                 | 2.004                                                      | 7.883                                                                                                                                                                                                                                                                                                      |                                                                                                                                                                                                                                                                                                                                                                                                                                                                                                                                                                                                                                                                                                                                                                                                                                                                                                                                                                                                                                                                                                                                                                                                                                                                                                                                                                                                                                                                             |                 |       |       |                          |        |        |                          |        |        |                          |        |        |                                    |        |        |                           |              |              |                           |                |                |   |               |             |             |              |             |         |              |         |                        |  |  |                    |    |    |           |        |         |                |       |       |      |       |       |                 |                             |                        |                                   |         |        |                           |                        |                 |                                   |              |                |
| Plateau                            | 0.7699                                                     | 0.4145                                                                                                                                                                                                                                                                                                     |                                                                                                                                                                                                                                                                                                                                                                                                                                                                                                                                                                                                                                                                                                                                                                                                                                                                                                                                                                                                                                                                                                                                                                                                                                                                                                                                                                                                                                                                             |                 |       |       |                          |        |        |                          |        |        |                          |        |        |                                    |        |        |                           |              |              |                           |                |                |   |               |             |             |              |             |         |              |         |                        |  |  |                    |    |    |           |        |         |                |       |       |      |       |       |                 |                             |                        |                                   |         |        |                           |                        |                 |                                   |              |                |
| K                                  | 0.3351                                                     | 1.289                                                                                                                                                                                                                                                                                                      |                                                                                                                                                                                                                                                                                                                                                                                                                                                                                                                                                                                                                                                                                                                                                                                                                                                                                                                                                                                                                                                                                                                                                                                                                                                                                                                                                                                                                                                                             |                 |       |       |                          |        |        |                          |        |        |                          |        |        |                                    |        |        |                           |              |              |                           |                |                |   |               |             |             |              |             |         |              |         |                        |  |  |                    |    |    |           |        |         |                |       |       |      |       |       |                 |                             |                        |                                   |         |        |                           |                        |                 |                                   |              |                |

|    |                                                            |                                                  |                                    |                                     |                     |
|----|------------------------------------------------------------|--------------------------------------------------|------------------------------------|-------------------------------------|---------------------|
|    |                                                            |                                                  | Half Life                          | 2.069                               | 0.5377              |
|    |                                                            |                                                  | Tau                                | 2.984                               | 0.7758              |
|    |                                                            |                                                  | Span                               | 1.234                               | 7.469               |
|    |                                                            |                                                  | <b>Std. Error</b>                  |                                     |                     |
|    |                                                            |                                                  | Y0                                 | 1.074                               | 5.221               |
|    |                                                            |                                                  | Plateau                            | 0.5364                              | 0.2053              |
|    |                                                            |                                                  | K                                  | 0.6089                              | 0.6790              |
|    |                                                            |                                                  | Span                               | 0.8570                              | 5.124               |
|    |                                                            |                                                  | <b>95% CI (profile likelihood)</b> |                                     |                     |
|    |                                                            |                                                  | Y0                                 | "0.8934 to ???"                     | "2.751 to ???"      |
|    |                                                            |                                                  | Plateau                            | "??? to 1.283"                      | "-0.2298 to 0.8097" |
|    |                                                            |                                                  | K                                  | ???                                 | "0.3529 to ???"     |
|    |                                                            |                                                  | Half Life                          | ???                                 | "??? to 1.964"      |
|    |                                                            |                                                  | Tau                                | ???                                 | "??? to 2.834"      |
|    |                                                            |                                                  | <b>Goodness of Fit</b>             |                                     |                     |
|    |                                                            |                                                  | Degrees of Freedom                 | 64                                  | 34                  |
|    |                                                            |                                                  | R squared                          | 0.04135                             | 0.4466              |
|    |                                                            |                                                  | Sum of Squares                     | 109.3                               | 24.43               |
|    |                                                            |                                                  | Sy.x                               | 1.307                               | 0.8477              |
|    |                                                            |                                                  | Null hypothesis                    | "One curve for all data sets"       |                     |
|    |                                                            |                                                  | Alternative hypothesis             | "Different curve for each data set" |                     |
|    |                                                            |                                                  | P value                            | 0.1119                              |                     |
|    |                                                            |                                                  | Conclusion (alpha = 0.05)          | "Do not reject null hypothesis"     |                     |
|    |                                                            |                                                  | Preferred model                    | "One curve for all data sets"       |                     |
|    |                                                            |                                                  | F (DFn, DFd)                       | "2.050 (3, 98)"                     |                     |
| 3h | Ctrl: 7 (4 males + 3 females); SD: 6 (3 males + 3 females) | Non-linear regression with one phase decay model | <b>Best-fit values</b>             | <b>Ctrl</b>                         | <b>SD</b>           |
|    |                                                            |                                                  | Y0                                 | 9.034                               | 7.911               |
|    |                                                            |                                                  | Plateau                            | 1.101                               | 2.076               |
|    |                                                            |                                                  | K                                  | 0.8362                              | 0.4451              |
|    |                                                            |                                                  | Half Life                          | 0.8289                              | 1.557               |
|    |                                                            |                                                  | Tau                                | 1.196                               | 2.247               |
|    |                                                            |                                                  | Span                               | 7.933                               | 5.835               |
|    |                                                            |                                                  | <b>Std. Error</b>                  |                                     |                     |
|    |                                                            |                                                  | Y0                                 | "4.293 to 97.28"                    | "4.659 to 15.64"    |
|    |                                                            |                                                  | Plateau                            | "0.07981 to 1.623"                  | "??? to 2.971"      |
|    |                                                            |                                                  | K                                  | "0.2298 to 3.383"                   | "??? to 1.264"      |
|    |                                                            |                                                  | Span                               | "0.2049 to 3.016"                   | "0.5484 to ???"     |
|    |                                                            |                                                  | <b>95% CI (profile likelihood)</b> |                                     |                     |
|    |                                                            |                                                  | Y0                                 | "0.2956 to 4.351"                   | "0.7912 to ???"     |

|                                    |                                                            |                                                  | <table border="1"> <tr> <td></td> <td>67</td> <td>56</td> </tr> <tr> <td>Plateau</td> <td></td> <td></td> </tr> <tr> <td></td> <td>0.2998</td> <td>0.2454</td> </tr> <tr> <td>K</td> <td></td> <td></td> </tr> <tr> <td>Half Life</td> <td>177.8</td> <td>239.3</td> </tr> <tr> <td>Tau</td> <td>1.629</td> <td>2.067</td> </tr> <tr> <td><b>Goodness of Fit</b></td> <td>9.034</td> <td>7.911</td> </tr> <tr> <td>Degrees of Freedom</td> <td>1.101</td> <td>2.076</td> </tr> <tr> <td>R squared</td> <td>0.8362</td> <td>0.4451</td> </tr> <tr> <td>Sum of Squares</td> <td>0.8289</td> <td>1.557</td> </tr> <tr> <td>Sy.x</td> <td>1.196</td> <td>2.247</td> </tr> </table> <table border="1"> <tr> <td>Null hypothesis</td> <td>"One curve for all data sets"</td> </tr> <tr> <td>Alternative hypothesis</td> <td>"Different curve for each data set"</td> </tr> <tr> <td>P value</td> <td>0.0004</td> </tr> <tr> <td>Conclusion (alpha = 0.05)</td> <td>"Reject null hypothesis"</td> </tr> <tr> <td>Preferred model</td> <td>"Different curve for each data set"</td> </tr> <tr> <td>F (DFn, DFd)</td> <td>"6.424 (3, 123)"</td> </tr> </table>                                                                                                                                                                                                                                                                                                                                                                                                                                                                                                  |                        | 67          | 56        | Plateau |       |       |         | 0.2998 | 0.2454 | K |           |        | Half Life | 177.8  | 239.3  | Tau | 1.629  | 2.067 | <b>Goodness of Fit</b> | 9.034  | 7.911 | Degrees of Freedom | 1.101 | 2.076 | R squared | 0.8362            | 0.4451          | Sum of Squares | 0.8289 | 1.557          | Sy.x | 1.196 | 2.247            | Null hypothesis | "One curve for all data sets" | Alternative hypothesis | "Different curve for each data set" | P value | 0.0004             | Conclusion (alpha = 0.05) | "Reject null hypothesis" | Preferred model | "Different curve for each data set" | F (DFn, DFd) | "6.424 (3, 123)" |         |  |  |  |           |        |   |  |  |           |       |       |     |        |        |                        |       |       |                    |        |        |           |           |        |                |        |        |      |        |       |
|------------------------------------|------------------------------------------------------------|--------------------------------------------------|--------------------------------------------------------------------------------------------------------------------------------------------------------------------------------------------------------------------------------------------------------------------------------------------------------------------------------------------------------------------------------------------------------------------------------------------------------------------------------------------------------------------------------------------------------------------------------------------------------------------------------------------------------------------------------------------------------------------------------------------------------------------------------------------------------------------------------------------------------------------------------------------------------------------------------------------------------------------------------------------------------------------------------------------------------------------------------------------------------------------------------------------------------------------------------------------------------------------------------------------------------------------------------------------------------------------------------------------------------------------------------------------------------------------------------------------------------------------------------------------------------------------------------------------------------------------------------------------------------------------------------------------------------|------------------------|-------------|-----------|---------|-------|-------|---------|--------|--------|---|-----------|--------|-----------|--------|--------|-----|--------|-------|------------------------|--------|-------|--------------------|-------|-------|-----------|-------------------|-----------------|----------------|--------|----------------|------|-------|------------------|-----------------|-------------------------------|------------------------|-------------------------------------|---------|--------------------|---------------------------|--------------------------|-----------------|-------------------------------------|--------------|------------------|---------|--|--|--|-----------|--------|---|--|--|-----------|-------|-------|-----|--------|--------|------------------------|-------|-------|--------------------|--------|--------|-----------|-----------|--------|----------------|--------|--------|------|--------|-------|
|                                    | 67                                                         | 56                                               |                                                                                                                                                                                                                                                                                                                                                                                                                                                                                                                                                                                                                                                                                                                                                                                                                                                                                                                                                                                                                                                                                                                                                                                                                                                                                                                                                                                                                                                                                                                                                                                                                                                        |                        |             |           |         |       |       |         |        |        |   |           |        |           |        |        |     |        |       |                        |        |       |                    |       |       |           |                   |                 |                |        |                |      |       |                  |                 |                               |                        |                                     |         |                    |                           |                          |                 |                                     |              |                  |         |  |  |  |           |        |   |  |  |           |       |       |     |        |        |                        |       |       |                    |        |        |           |           |        |                |        |        |      |        |       |
| Plateau                            |                                                            |                                                  |                                                                                                                                                                                                                                                                                                                                                                                                                                                                                                                                                                                                                                                                                                                                                                                                                                                                                                                                                                                                                                                                                                                                                                                                                                                                                                                                                                                                                                                                                                                                                                                                                                                        |                        |             |           |         |       |       |         |        |        |   |           |        |           |        |        |     |        |       |                        |        |       |                    |       |       |           |                   |                 |                |        |                |      |       |                  |                 |                               |                        |                                     |         |                    |                           |                          |                 |                                     |              |                  |         |  |  |  |           |        |   |  |  |           |       |       |     |        |        |                        |       |       |                    |        |        |           |           |        |                |        |        |      |        |       |
|                                    | 0.2998                                                     | 0.2454                                           |                                                                                                                                                                                                                                                                                                                                                                                                                                                                                                                                                                                                                                                                                                                                                                                                                                                                                                                                                                                                                                                                                                                                                                                                                                                                                                                                                                                                                                                                                                                                                                                                                                                        |                        |             |           |         |       |       |         |        |        |   |           |        |           |        |        |     |        |       |                        |        |       |                    |       |       |           |                   |                 |                |        |                |      |       |                  |                 |                               |                        |                                     |         |                    |                           |                          |                 |                                     |              |                  |         |  |  |  |           |        |   |  |  |           |       |       |     |        |        |                        |       |       |                    |        |        |           |           |        |                |        |        |      |        |       |
| K                                  |                                                            |                                                  |                                                                                                                                                                                                                                                                                                                                                                                                                                                                                                                                                                                                                                                                                                                                                                                                                                                                                                                                                                                                                                                                                                                                                                                                                                                                                                                                                                                                                                                                                                                                                                                                                                                        |                        |             |           |         |       |       |         |        |        |   |           |        |           |        |        |     |        |       |                        |        |       |                    |       |       |           |                   |                 |                |        |                |      |       |                  |                 |                               |                        |                                     |         |                    |                           |                          |                 |                                     |              |                  |         |  |  |  |           |        |   |  |  |           |       |       |     |        |        |                        |       |       |                    |        |        |           |           |        |                |        |        |      |        |       |
| Half Life                          | 177.8                                                      | 239.3                                            |                                                                                                                                                                                                                                                                                                                                                                                                                                                                                                                                                                                                                                                                                                                                                                                                                                                                                                                                                                                                                                                                                                                                                                                                                                                                                                                                                                                                                                                                                                                                                                                                                                                        |                        |             |           |         |       |       |         |        |        |   |           |        |           |        |        |     |        |       |                        |        |       |                    |       |       |           |                   |                 |                |        |                |      |       |                  |                 |                               |                        |                                     |         |                    |                           |                          |                 |                                     |              |                  |         |  |  |  |           |        |   |  |  |           |       |       |     |        |        |                        |       |       |                    |        |        |           |           |        |                |        |        |      |        |       |
| Tau                                | 1.629                                                      | 2.067                                            |                                                                                                                                                                                                                                                                                                                                                                                                                                                                                                                                                                                                                                                                                                                                                                                                                                                                                                                                                                                                                                                                                                                                                                                                                                                                                                                                                                                                                                                                                                                                                                                                                                                        |                        |             |           |         |       |       |         |        |        |   |           |        |           |        |        |     |        |       |                        |        |       |                    |       |       |           |                   |                 |                |        |                |      |       |                  |                 |                               |                        |                                     |         |                    |                           |                          |                 |                                     |              |                  |         |  |  |  |           |        |   |  |  |           |       |       |     |        |        |                        |       |       |                    |        |        |           |           |        |                |        |        |      |        |       |
| <b>Goodness of Fit</b>             | 9.034                                                      | 7.911                                            |                                                                                                                                                                                                                                                                                                                                                                                                                                                                                                                                                                                                                                                                                                                                                                                                                                                                                                                                                                                                                                                                                                                                                                                                                                                                                                                                                                                                                                                                                                                                                                                                                                                        |                        |             |           |         |       |       |         |        |        |   |           |        |           |        |        |     |        |       |                        |        |       |                    |       |       |           |                   |                 |                |        |                |      |       |                  |                 |                               |                        |                                     |         |                    |                           |                          |                 |                                     |              |                  |         |  |  |  |           |        |   |  |  |           |       |       |     |        |        |                        |       |       |                    |        |        |           |           |        |                |        |        |      |        |       |
| Degrees of Freedom                 | 1.101                                                      | 2.076                                            |                                                                                                                                                                                                                                                                                                                                                                                                                                                                                                                                                                                                                                                                                                                                                                                                                                                                                                                                                                                                                                                                                                                                                                                                                                                                                                                                                                                                                                                                                                                                                                                                                                                        |                        |             |           |         |       |       |         |        |        |   |           |        |           |        |        |     |        |       |                        |        |       |                    |       |       |           |                   |                 |                |        |                |      |       |                  |                 |                               |                        |                                     |         |                    |                           |                          |                 |                                     |              |                  |         |  |  |  |           |        |   |  |  |           |       |       |     |        |        |                        |       |       |                    |        |        |           |           |        |                |        |        |      |        |       |
| R squared                          | 0.8362                                                     | 0.4451                                           |                                                                                                                                                                                                                                                                                                                                                                                                                                                                                                                                                                                                                                                                                                                                                                                                                                                                                                                                                                                                                                                                                                                                                                                                                                                                                                                                                                                                                                                                                                                                                                                                                                                        |                        |             |           |         |       |       |         |        |        |   |           |        |           |        |        |     |        |       |                        |        |       |                    |       |       |           |                   |                 |                |        |                |      |       |                  |                 |                               |                        |                                     |         |                    |                           |                          |                 |                                     |              |                  |         |  |  |  |           |        |   |  |  |           |       |       |     |        |        |                        |       |       |                    |        |        |           |           |        |                |        |        |      |        |       |
| Sum of Squares                     | 0.8289                                                     | 1.557                                            |                                                                                                                                                                                                                                                                                                                                                                                                                                                                                                                                                                                                                                                                                                                                                                                                                                                                                                                                                                                                                                                                                                                                                                                                                                                                                                                                                                                                                                                                                                                                                                                                                                                        |                        |             |           |         |       |       |         |        |        |   |           |        |           |        |        |     |        |       |                        |        |       |                    |       |       |           |                   |                 |                |        |                |      |       |                  |                 |                               |                        |                                     |         |                    |                           |                          |                 |                                     |              |                  |         |  |  |  |           |        |   |  |  |           |       |       |     |        |        |                        |       |       |                    |        |        |           |           |        |                |        |        |      |        |       |
| Sy.x                               | 1.196                                                      | 2.247                                            |                                                                                                                                                                                                                                                                                                                                                                                                                                                                                                                                                                                                                                                                                                                                                                                                                                                                                                                                                                                                                                                                                                                                                                                                                                                                                                                                                                                                                                                                                                                                                                                                                                                        |                        |             |           |         |       |       |         |        |        |   |           |        |           |        |        |     |        |       |                        |        |       |                    |       |       |           |                   |                 |                |        |                |      |       |                  |                 |                               |                        |                                     |         |                    |                           |                          |                 |                                     |              |                  |         |  |  |  |           |        |   |  |  |           |       |       |     |        |        |                        |       |       |                    |        |        |           |           |        |                |        |        |      |        |       |
| Null hypothesis                    | "One curve for all data sets"                              |                                                  |                                                                                                                                                                                                                                                                                                                                                                                                                                                                                                                                                                                                                                                                                                                                                                                                                                                                                                                                                                                                                                                                                                                                                                                                                                                                                                                                                                                                                                                                                                                                                                                                                                                        |                        |             |           |         |       |       |         |        |        |   |           |        |           |        |        |     |        |       |                        |        |       |                    |       |       |           |                   |                 |                |        |                |      |       |                  |                 |                               |                        |                                     |         |                    |                           |                          |                 |                                     |              |                  |         |  |  |  |           |        |   |  |  |           |       |       |     |        |        |                        |       |       |                    |        |        |           |           |        |                |        |        |      |        |       |
| Alternative hypothesis             | "Different curve for each data set"                        |                                                  |                                                                                                                                                                                                                                                                                                                                                                                                                                                                                                                                                                                                                                                                                                                                                                                                                                                                                                                                                                                                                                                                                                                                                                                                                                                                                                                                                                                                                                                                                                                                                                                                                                                        |                        |             |           |         |       |       |         |        |        |   |           |        |           |        |        |     |        |       |                        |        |       |                    |       |       |           |                   |                 |                |        |                |      |       |                  |                 |                               |                        |                                     |         |                    |                           |                          |                 |                                     |              |                  |         |  |  |  |           |        |   |  |  |           |       |       |     |        |        |                        |       |       |                    |        |        |           |           |        |                |        |        |      |        |       |
| P value                            | 0.0004                                                     |                                                  |                                                                                                                                                                                                                                                                                                                                                                                                                                                                                                                                                                                                                                                                                                                                                                                                                                                                                                                                                                                                                                                                                                                                                                                                                                                                                                                                                                                                                                                                                                                                                                                                                                                        |                        |             |           |         |       |       |         |        |        |   |           |        |           |        |        |     |        |       |                        |        |       |                    |       |       |           |                   |                 |                |        |                |      |       |                  |                 |                               |                        |                                     |         |                    |                           |                          |                 |                                     |              |                  |         |  |  |  |           |        |   |  |  |           |       |       |     |        |        |                        |       |       |                    |        |        |           |           |        |                |        |        |      |        |       |
| Conclusion (alpha = 0.05)          | "Reject null hypothesis"                                   |                                                  |                                                                                                                                                                                                                                                                                                                                                                                                                                                                                                                                                                                                                                                                                                                                                                                                                                                                                                                                                                                                                                                                                                                                                                                                                                                                                                                                                                                                                                                                                                                                                                                                                                                        |                        |             |           |         |       |       |         |        |        |   |           |        |           |        |        |     |        |       |                        |        |       |                    |       |       |           |                   |                 |                |        |                |      |       |                  |                 |                               |                        |                                     |         |                    |                           |                          |                 |                                     |              |                  |         |  |  |  |           |        |   |  |  |           |       |       |     |        |        |                        |       |       |                    |        |        |           |           |        |                |        |        |      |        |       |
| Preferred model                    | "Different curve for each data set"                        |                                                  |                                                                                                                                                                                                                                                                                                                                                                                                                                                                                                                                                                                                                                                                                                                                                                                                                                                                                                                                                                                                                                                                                                                                                                                                                                                                                                                                                                                                                                                                                                                                                                                                                                                        |                        |             |           |         |       |       |         |        |        |   |           |        |           |        |        |     |        |       |                        |        |       |                    |       |       |           |                   |                 |                |        |                |      |       |                  |                 |                               |                        |                                     |         |                    |                           |                          |                 |                                     |              |                  |         |  |  |  |           |        |   |  |  |           |       |       |     |        |        |                        |       |       |                    |        |        |           |           |        |                |        |        |      |        |       |
| F (DFn, DFd)                       | "6.424 (3, 123)"                                           |                                                  |                                                                                                                                                                                                                                                                                                                                                                                                                                                                                                                                                                                                                                                                                                                                                                                                                                                                                                                                                                                                                                                                                                                                                                                                                                                                                                                                                                                                                                                                                                                                                                                                                                                        |                        |             |           |         |       |       |         |        |        |   |           |        |           |        |        |     |        |       |                        |        |       |                    |       |       |           |                   |                 |                |        |                |      |       |                  |                 |                               |                        |                                     |         |                    |                           |                          |                 |                                     |              |                  |         |  |  |  |           |        |   |  |  |           |       |       |     |        |        |                        |       |       |                    |        |        |           |           |        |                |        |        |      |        |       |
| 3i                                 | Ctrl: 7 (4 males + 3 females); SD: 6 (3 males + 3 females) | Non-linear regression with one phase decay model | <table border="1"> <thead> <tr> <th><b>Best-fit values</b></th> <th><b>Ctrl</b></th> <th><b>SD</b></th> </tr> </thead> <tbody> <tr> <td>Y0</td> <td>1.126</td> <td>3.456</td> </tr> <tr> <td>Plateau</td> <td>0.1894</td> <td>0.6136</td> </tr> <tr> <td>K</td> <td>-0.006347</td> <td>0.9663</td> </tr> <tr> <td>Half Life</td> <td>-109.2</td> <td>0.7174</td> </tr> <tr> <td>Tau</td> <td>-157.6</td> <td>1.035</td> </tr> <tr> <td>Span</td> <td>0.9370</td> <td>2.843</td> </tr> <tr> <td><b>Std. Error</b></td> <td></td> <td></td> </tr> <tr> <td>Y0</td> <td>"0.9186 to 1.622"</td> <td>"0.9739 to ???"</td> </tr> <tr> <td>Plateau</td> <td>???</td> <td>"??? to 1.020"</td> </tr> <tr> <td>K</td> <td>???</td> <td>"-0.2936 to ???"</td> </tr> <tr> <td>Span</td> <td>???</td> <td>"??? to +infinity"</td> </tr> <tr> <td><b>95% CI (profile likelihood)</b></td> <td>???</td> <td>"??? to +infinity"</td> </tr> <tr> <td>Y0</td> <td></td> <td></td> </tr> <tr> <td></td> <td>56</td> <td>39</td> </tr> <tr> <td>Plateau</td> <td></td> <td></td> </tr> <tr> <td></td> <td>0.0003491</td> <td>0.1320</td> </tr> <tr> <td>K</td> <td></td> <td></td> </tr> <tr> <td>Half Life</td> <td>46.62</td> <td>36.83</td> </tr> <tr> <td>Tau</td> <td>0.9124</td> <td>0.9718</td> </tr> <tr> <td><b>Goodness of Fit</b></td> <td>1.126</td> <td>3.456</td> </tr> <tr> <td>Degrees of Freedom</td> <td>0.1894</td> <td>0.6136</td> </tr> <tr> <td>R squared</td> <td>-0.006347</td> <td>0.9663</td> </tr> <tr> <td>Sum of Squares</td> <td>-109.2</td> <td>0.7174</td> </tr> <tr> <td>Sy.x</td> <td>-157.6</td> <td>1.035</td> </tr> </tbody> </table> | <b>Best-fit values</b> | <b>Ctrl</b> | <b>SD</b> | Y0      | 1.126 | 3.456 | Plateau | 0.1894 | 0.6136 | K | -0.006347 | 0.9663 | Half Life | -109.2 | 0.7174 | Tau | -157.6 | 1.035 | Span                   | 0.9370 | 2.843 | <b>Std. Error</b>  |       |       | Y0        | "0.9186 to 1.622" | "0.9739 to ???" | Plateau        | ???    | "??? to 1.020" | K    | ???   | "-0.2936 to ???" | Span            | ???                           | "??? to +infinity"     | <b>95% CI (profile likelihood)</b>  | ???     | "??? to +infinity" | Y0                        |                          |                 |                                     | 56           | 39               | Plateau |  |  |  | 0.0003491 | 0.1320 | K |  |  | Half Life | 46.62 | 36.83 | Tau | 0.9124 | 0.9718 | <b>Goodness of Fit</b> | 1.126 | 3.456 | Degrees of Freedom | 0.1894 | 0.6136 | R squared | -0.006347 | 0.9663 | Sum of Squares | -109.2 | 0.7174 | Sy.x | -157.6 | 1.035 |
| <b>Best-fit values</b>             | <b>Ctrl</b>                                                | <b>SD</b>                                        |                                                                                                                                                                                                                                                                                                                                                                                                                                                                                                                                                                                                                                                                                                                                                                                                                                                                                                                                                                                                                                                                                                                                                                                                                                                                                                                                                                                                                                                                                                                                                                                                                                                        |                        |             |           |         |       |       |         |        |        |   |           |        |           |        |        |     |        |       |                        |        |       |                    |       |       |           |                   |                 |                |        |                |      |       |                  |                 |                               |                        |                                     |         |                    |                           |                          |                 |                                     |              |                  |         |  |  |  |           |        |   |  |  |           |       |       |     |        |        |                        |       |       |                    |        |        |           |           |        |                |        |        |      |        |       |
| Y0                                 | 1.126                                                      | 3.456                                            |                                                                                                                                                                                                                                                                                                                                                                                                                                                                                                                                                                                                                                                                                                                                                                                                                                                                                                                                                                                                                                                                                                                                                                                                                                                                                                                                                                                                                                                                                                                                                                                                                                                        |                        |             |           |         |       |       |         |        |        |   |           |        |           |        |        |     |        |       |                        |        |       |                    |       |       |           |                   |                 |                |        |                |      |       |                  |                 |                               |                        |                                     |         |                    |                           |                          |                 |                                     |              |                  |         |  |  |  |           |        |   |  |  |           |       |       |     |        |        |                        |       |       |                    |        |        |           |           |        |                |        |        |      |        |       |
| Plateau                            | 0.1894                                                     | 0.6136                                           |                                                                                                                                                                                                                                                                                                                                                                                                                                                                                                                                                                                                                                                                                                                                                                                                                                                                                                                                                                                                                                                                                                                                                                                                                                                                                                                                                                                                                                                                                                                                                                                                                                                        |                        |             |           |         |       |       |         |        |        |   |           |        |           |        |        |     |        |       |                        |        |       |                    |       |       |           |                   |                 |                |        |                |      |       |                  |                 |                               |                        |                                     |         |                    |                           |                          |                 |                                     |              |                  |         |  |  |  |           |        |   |  |  |           |       |       |     |        |        |                        |       |       |                    |        |        |           |           |        |                |        |        |      |        |       |
| K                                  | -0.006347                                                  | 0.9663                                           |                                                                                                                                                                                                                                                                                                                                                                                                                                                                                                                                                                                                                                                                                                                                                                                                                                                                                                                                                                                                                                                                                                                                                                                                                                                                                                                                                                                                                                                                                                                                                                                                                                                        |                        |             |           |         |       |       |         |        |        |   |           |        |           |        |        |     |        |       |                        |        |       |                    |       |       |           |                   |                 |                |        |                |      |       |                  |                 |                               |                        |                                     |         |                    |                           |                          |                 |                                     |              |                  |         |  |  |  |           |        |   |  |  |           |       |       |     |        |        |                        |       |       |                    |        |        |           |           |        |                |        |        |      |        |       |
| Half Life                          | -109.2                                                     | 0.7174                                           |                                                                                                                                                                                                                                                                                                                                                                                                                                                                                                                                                                                                                                                                                                                                                                                                                                                                                                                                                                                                                                                                                                                                                                                                                                                                                                                                                                                                                                                                                                                                                                                                                                                        |                        |             |           |         |       |       |         |        |        |   |           |        |           |        |        |     |        |       |                        |        |       |                    |       |       |           |                   |                 |                |        |                |      |       |                  |                 |                               |                        |                                     |         |                    |                           |                          |                 |                                     |              |                  |         |  |  |  |           |        |   |  |  |           |       |       |     |        |        |                        |       |       |                    |        |        |           |           |        |                |        |        |      |        |       |
| Tau                                | -157.6                                                     | 1.035                                            |                                                                                                                                                                                                                                                                                                                                                                                                                                                                                                                                                                                                                                                                                                                                                                                                                                                                                                                                                                                                                                                                                                                                                                                                                                                                                                                                                                                                                                                                                                                                                                                                                                                        |                        |             |           |         |       |       |         |        |        |   |           |        |           |        |        |     |        |       |                        |        |       |                    |       |       |           |                   |                 |                |        |                |      |       |                  |                 |                               |                        |                                     |         |                    |                           |                          |                 |                                     |              |                  |         |  |  |  |           |        |   |  |  |           |       |       |     |        |        |                        |       |       |                    |        |        |           |           |        |                |        |        |      |        |       |
| Span                               | 0.9370                                                     | 2.843                                            |                                                                                                                                                                                                                                                                                                                                                                                                                                                                                                                                                                                                                                                                                                                                                                                                                                                                                                                                                                                                                                                                                                                                                                                                                                                                                                                                                                                                                                                                                                                                                                                                                                                        |                        |             |           |         |       |       |         |        |        |   |           |        |           |        |        |     |        |       |                        |        |       |                    |       |       |           |                   |                 |                |        |                |      |       |                  |                 |                               |                        |                                     |         |                    |                           |                          |                 |                                     |              |                  |         |  |  |  |           |        |   |  |  |           |       |       |     |        |        |                        |       |       |                    |        |        |           |           |        |                |        |        |      |        |       |
| <b>Std. Error</b>                  |                                                            |                                                  |                                                                                                                                                                                                                                                                                                                                                                                                                                                                                                                                                                                                                                                                                                                                                                                                                                                                                                                                                                                                                                                                                                                                                                                                                                                                                                                                                                                                                                                                                                                                                                                                                                                        |                        |             |           |         |       |       |         |        |        |   |           |        |           |        |        |     |        |       |                        |        |       |                    |       |       |           |                   |                 |                |        |                |      |       |                  |                 |                               |                        |                                     |         |                    |                           |                          |                 |                                     |              |                  |         |  |  |  |           |        |   |  |  |           |       |       |     |        |        |                        |       |       |                    |        |        |           |           |        |                |        |        |      |        |       |
| Y0                                 | "0.9186 to 1.622"                                          | "0.9739 to ???"                                  |                                                                                                                                                                                                                                                                                                                                                                                                                                                                                                                                                                                                                                                                                                                                                                                                                                                                                                                                                                                                                                                                                                                                                                                                                                                                                                                                                                                                                                                                                                                                                                                                                                                        |                        |             |           |         |       |       |         |        |        |   |           |        |           |        |        |     |        |       |                        |        |       |                    |       |       |           |                   |                 |                |        |                |      |       |                  |                 |                               |                        |                                     |         |                    |                           |                          |                 |                                     |              |                  |         |  |  |  |           |        |   |  |  |           |       |       |     |        |        |                        |       |       |                    |        |        |           |           |        |                |        |        |      |        |       |
| Plateau                            | ???                                                        | "??? to 1.020"                                   |                                                                                                                                                                                                                                                                                                                                                                                                                                                                                                                                                                                                                                                                                                                                                                                                                                                                                                                                                                                                                                                                                                                                                                                                                                                                                                                                                                                                                                                                                                                                                                                                                                                        |                        |             |           |         |       |       |         |        |        |   |           |        |           |        |        |     |        |       |                        |        |       |                    |       |       |           |                   |                 |                |        |                |      |       |                  |                 |                               |                        |                                     |         |                    |                           |                          |                 |                                     |              |                  |         |  |  |  |           |        |   |  |  |           |       |       |     |        |        |                        |       |       |                    |        |        |           |           |        |                |        |        |      |        |       |
| K                                  | ???                                                        | "-0.2936 to ???"                                 |                                                                                                                                                                                                                                                                                                                                                                                                                                                                                                                                                                                                                                                                                                                                                                                                                                                                                                                                                                                                                                                                                                                                                                                                                                                                                                                                                                                                                                                                                                                                                                                                                                                        |                        |             |           |         |       |       |         |        |        |   |           |        |           |        |        |     |        |       |                        |        |       |                    |       |       |           |                   |                 |                |        |                |      |       |                  |                 |                               |                        |                                     |         |                    |                           |                          |                 |                                     |              |                  |         |  |  |  |           |        |   |  |  |           |       |       |     |        |        |                        |       |       |                    |        |        |           |           |        |                |        |        |      |        |       |
| Span                               | ???                                                        | "??? to +infinity"                               |                                                                                                                                                                                                                                                                                                                                                                                                                                                                                                                                                                                                                                                                                                                                                                                                                                                                                                                                                                                                                                                                                                                                                                                                                                                                                                                                                                                                                                                                                                                                                                                                                                                        |                        |             |           |         |       |       |         |        |        |   |           |        |           |        |        |     |        |       |                        |        |       |                    |       |       |           |                   |                 |                |        |                |      |       |                  |                 |                               |                        |                                     |         |                    |                           |                          |                 |                                     |              |                  |         |  |  |  |           |        |   |  |  |           |       |       |     |        |        |                        |       |       |                    |        |        |           |           |        |                |        |        |      |        |       |
| <b>95% CI (profile likelihood)</b> | ???                                                        | "??? to +infinity"                               |                                                                                                                                                                                                                                                                                                                                                                                                                                                                                                                                                                                                                                                                                                                                                                                                                                                                                                                                                                                                                                                                                                                                                                                                                                                                                                                                                                                                                                                                                                                                                                                                                                                        |                        |             |           |         |       |       |         |        |        |   |           |        |           |        |        |     |        |       |                        |        |       |                    |       |       |           |                   |                 |                |        |                |      |       |                  |                 |                               |                        |                                     |         |                    |                           |                          |                 |                                     |              |                  |         |  |  |  |           |        |   |  |  |           |       |       |     |        |        |                        |       |       |                    |        |        |           |           |        |                |        |        |      |        |       |
| Y0                                 |                                                            |                                                  |                                                                                                                                                                                                                                                                                                                                                                                                                                                                                                                                                                                                                                                                                                                                                                                                                                                                                                                                                                                                                                                                                                                                                                                                                                                                                                                                                                                                                                                                                                                                                                                                                                                        |                        |             |           |         |       |       |         |        |        |   |           |        |           |        |        |     |        |       |                        |        |       |                    |       |       |           |                   |                 |                |        |                |      |       |                  |                 |                               |                        |                                     |         |                    |                           |                          |                 |                                     |              |                  |         |  |  |  |           |        |   |  |  |           |       |       |     |        |        |                        |       |       |                    |        |        |           |           |        |                |        |        |      |        |       |
|                                    | 56                                                         | 39                                               |                                                                                                                                                                                                                                                                                                                                                                                                                                                                                                                                                                                                                                                                                                                                                                                                                                                                                                                                                                                                                                                                                                                                                                                                                                                                                                                                                                                                                                                                                                                                                                                                                                                        |                        |             |           |         |       |       |         |        |        |   |           |        |           |        |        |     |        |       |                        |        |       |                    |       |       |           |                   |                 |                |        |                |      |       |                  |                 |                               |                        |                                     |         |                    |                           |                          |                 |                                     |              |                  |         |  |  |  |           |        |   |  |  |           |       |       |     |        |        |                        |       |       |                    |        |        |           |           |        |                |        |        |      |        |       |
| Plateau                            |                                                            |                                                  |                                                                                                                                                                                                                                                                                                                                                                                                                                                                                                                                                                                                                                                                                                                                                                                                                                                                                                                                                                                                                                                                                                                                                                                                                                                                                                                                                                                                                                                                                                                                                                                                                                                        |                        |             |           |         |       |       |         |        |        |   |           |        |           |        |        |     |        |       |                        |        |       |                    |       |       |           |                   |                 |                |        |                |      |       |                  |                 |                               |                        |                                     |         |                    |                           |                          |                 |                                     |              |                  |         |  |  |  |           |        |   |  |  |           |       |       |     |        |        |                        |       |       |                    |        |        |           |           |        |                |        |        |      |        |       |
|                                    | 0.0003491                                                  | 0.1320                                           |                                                                                                                                                                                                                                                                                                                                                                                                                                                                                                                                                                                                                                                                                                                                                                                                                                                                                                                                                                                                                                                                                                                                                                                                                                                                                                                                                                                                                                                                                                                                                                                                                                                        |                        |             |           |         |       |       |         |        |        |   |           |        |           |        |        |     |        |       |                        |        |       |                    |       |       |           |                   |                 |                |        |                |      |       |                  |                 |                               |                        |                                     |         |                    |                           |                          |                 |                                     |              |                  |         |  |  |  |           |        |   |  |  |           |       |       |     |        |        |                        |       |       |                    |        |        |           |           |        |                |        |        |      |        |       |
| K                                  |                                                            |                                                  |                                                                                                                                                                                                                                                                                                                                                                                                                                                                                                                                                                                                                                                                                                                                                                                                                                                                                                                                                                                                                                                                                                                                                                                                                                                                                                                                                                                                                                                                                                                                                                                                                                                        |                        |             |           |         |       |       |         |        |        |   |           |        |           |        |        |     |        |       |                        |        |       |                    |       |       |           |                   |                 |                |        |                |      |       |                  |                 |                               |                        |                                     |         |                    |                           |                          |                 |                                     |              |                  |         |  |  |  |           |        |   |  |  |           |       |       |     |        |        |                        |       |       |                    |        |        |           |           |        |                |        |        |      |        |       |
| Half Life                          | 46.62                                                      | 36.83                                            |                                                                                                                                                                                                                                                                                                                                                                                                                                                                                                                                                                                                                                                                                                                                                                                                                                                                                                                                                                                                                                                                                                                                                                                                                                                                                                                                                                                                                                                                                                                                                                                                                                                        |                        |             |           |         |       |       |         |        |        |   |           |        |           |        |        |     |        |       |                        |        |       |                    |       |       |           |                   |                 |                |        |                |      |       |                  |                 |                               |                        |                                     |         |                    |                           |                          |                 |                                     |              |                  |         |  |  |  |           |        |   |  |  |           |       |       |     |        |        |                        |       |       |                    |        |        |           |           |        |                |        |        |      |        |       |
| Tau                                | 0.9124                                                     | 0.9718                                           |                                                                                                                                                                                                                                                                                                                                                                                                                                                                                                                                                                                                                                                                                                                                                                                                                                                                                                                                                                                                                                                                                                                                                                                                                                                                                                                                                                                                                                                                                                                                                                                                                                                        |                        |             |           |         |       |       |         |        |        |   |           |        |           |        |        |     |        |       |                        |        |       |                    |       |       |           |                   |                 |                |        |                |      |       |                  |                 |                               |                        |                                     |         |                    |                           |                          |                 |                                     |              |                  |         |  |  |  |           |        |   |  |  |           |       |       |     |        |        |                        |       |       |                    |        |        |           |           |        |                |        |        |      |        |       |
| <b>Goodness of Fit</b>             | 1.126                                                      | 3.456                                            |                                                                                                                                                                                                                                                                                                                                                                                                                                                                                                                                                                                                                                                                                                                                                                                                                                                                                                                                                                                                                                                                                                                                                                                                                                                                                                                                                                                                                                                                                                                                                                                                                                                        |                        |             |           |         |       |       |         |        |        |   |           |        |           |        |        |     |        |       |                        |        |       |                    |       |       |           |                   |                 |                |        |                |      |       |                  |                 |                               |                        |                                     |         |                    |                           |                          |                 |                                     |              |                  |         |  |  |  |           |        |   |  |  |           |       |       |     |        |        |                        |       |       |                    |        |        |           |           |        |                |        |        |      |        |       |
| Degrees of Freedom                 | 0.1894                                                     | 0.6136                                           |                                                                                                                                                                                                                                                                                                                                                                                                                                                                                                                                                                                                                                                                                                                                                                                                                                                                                                                                                                                                                                                                                                                                                                                                                                                                                                                                                                                                                                                                                                                                                                                                                                                        |                        |             |           |         |       |       |         |        |        |   |           |        |           |        |        |     |        |       |                        |        |       |                    |       |       |           |                   |                 |                |        |                |      |       |                  |                 |                               |                        |                                     |         |                    |                           |                          |                 |                                     |              |                  |         |  |  |  |           |        |   |  |  |           |       |       |     |        |        |                        |       |       |                    |        |        |           |           |        |                |        |        |      |        |       |
| R squared                          | -0.006347                                                  | 0.9663                                           |                                                                                                                                                                                                                                                                                                                                                                                                                                                                                                                                                                                                                                                                                                                                                                                                                                                                                                                                                                                                                                                                                                                                                                                                                                                                                                                                                                                                                                                                                                                                                                                                                                                        |                        |             |           |         |       |       |         |        |        |   |           |        |           |        |        |     |        |       |                        |        |       |                    |       |       |           |                   |                 |                |        |                |      |       |                  |                 |                               |                        |                                     |         |                    |                           |                          |                 |                                     |              |                  |         |  |  |  |           |        |   |  |  |           |       |       |     |        |        |                        |       |       |                    |        |        |           |           |        |                |        |        |      |        |       |
| Sum of Squares                     | -109.2                                                     | 0.7174                                           |                                                                                                                                                                                                                                                                                                                                                                                                                                                                                                                                                                                                                                                                                                                                                                                                                                                                                                                                                                                                                                                                                                                                                                                                                                                                                                                                                                                                                                                                                                                                                                                                                                                        |                        |             |           |         |       |       |         |        |        |   |           |        |           |        |        |     |        |       |                        |        |       |                    |       |       |           |                   |                 |                |        |                |      |       |                  |                 |                               |                        |                                     |         |                    |                           |                          |                 |                                     |              |                  |         |  |  |  |           |        |   |  |  |           |       |       |     |        |        |                        |       |       |                    |        |        |           |           |        |                |        |        |      |        |       |
| Sy.x                               | -157.6                                                     | 1.035                                            |                                                                                                                                                                                                                                                                                                                                                                                                                                                                                                                                                                                                                                                                                                                                                                                                                                                                                                                                                                                                                                                                                                                                                                                                                                                                                                                                                                                                                                                                                                                                                                                                                                                        |                        |             |           |         |       |       |         |        |        |   |           |        |           |        |        |     |        |       |                        |        |       |                    |       |       |           |                   |                 |                |        |                |      |       |                  |                 |                               |                        |                                     |         |                    |                           |                          |                 |                                     |              |                  |         |  |  |  |           |        |   |  |  |           |       |       |     |        |        |                        |       |       |                    |        |        |           |           |        |                |        |        |      |        |       |

|    |                                                            |                                                                                                                                                                                     |                                                  |                                     |                    |                           |                                     |  |
|----|------------------------------------------------------------|-------------------------------------------------------------------------------------------------------------------------------------------------------------------------------------|--------------------------------------------------|-------------------------------------|--------------------|---------------------------|-------------------------------------|--|
|    |                                                            |                                                                                                                                                                                     | Null hypothesis                                  | "One curve for all data sets"       |                    |                           |                                     |  |
|    |                                                            |                                                                                                                                                                                     | Alternative hypothesis                           | "Different curve for each data set" |                    |                           |                                     |  |
|    |                                                            |                                                                                                                                                                                     | P value                                          | 0.0672                              |                    |                           |                                     |  |
|    |                                                            |                                                                                                                                                                                     | Conclusion (alpha = 0.05)                        | "Do not reject null hypothesis"     |                    |                           |                                     |  |
|    |                                                            |                                                                                                                                                                                     | Preferred model                                  | "One curve for all data sets"       |                    |                           |                                     |  |
|    |                                                            |                                                                                                                                                                                     | F (DFn, DFd)                                     | "2.463 (3, 95)"                     |                    |                           |                                     |  |
| 3j | Ctrl: 7 (4 males + 3 females); SD: 6 (3 males + 3 females) | Non-linear regression with one phase decay model                                                                                                                                    | <b>Best-fit values</b>                           | <b>Ctrl</b>                         | <b>SD</b>          |                           |                                     |  |
|    |                                                            |                                                                                                                                                                                     | Y0                                               | 5.250                               | 2.017              |                           |                                     |  |
|    |                                                            |                                                                                                                                                                                     | Plateau                                          | 1.197                               | 0.7714             |                           |                                     |  |
|    |                                                            |                                                                                                                                                                                     | K                                                | 0.8691                              | 0.3574             |                           |                                     |  |
|    |                                                            |                                                                                                                                                                                     | Half Life                                        | 0.7975                              | 1.939              |                           |                                     |  |
|    |                                                            |                                                                                                                                                                                     | Tau                                              | 1.151                               | 2.798              |                           |                                     |  |
|    |                                                            |                                                                                                                                                                                     | Span                                             | 4.053                               | 1.246              |                           |                                     |  |
|    |                                                            |                                                                                                                                                                                     | <b>Std. Error</b>                                |                                     |                    |                           |                                     |  |
|    |                                                            |                                                                                                                                                                                     | Y0                                               | "2.444 to ???"                      | "0.8561 to ???"    |                           |                                     |  |
|    |                                                            |                                                                                                                                                                                     | Plateau                                          | "0.4634 to 1.557"                   | "??? to 1.372"     |                           |                                     |  |
|    |                                                            |                                                                                                                                                                                     | K                                                | "0.1702 to ???"                     | "??? to +infinity" |                           |                                     |  |
|    |                                                            |                                                                                                                                                                                     | Span                                             | "??? to 4.073"                      | ???                |                           |                                     |  |
|    |                                                            |                                                                                                                                                                                     | <b>95% CI (profile likelihood)</b>               | "??? to 5.876"                      | ???                |                           |                                     |  |
|    |                                                            |                                                                                                                                                                                     | Y0                                               |                                     |                    |                           |                                     |  |
|    |                                                            |                                                                                                                                                                                     |                                                  | 64                                  | 44                 |                           |                                     |  |
|    |                                                            |                                                                                                                                                                                     | Plateau                                          |                                     |                    |                           |                                     |  |
|    |                                                            |                                                                                                                                                                                     |                                                  | 0.1818                              | 0.04543            |                           |                                     |  |
|    |                                                            |                                                                                                                                                                                     | K                                                |                                     |                    |                           |                                     |  |
|    |                                                            |                                                                                                                                                                                     | Half Life                                        | 82.23                               | 70.00              |                           |                                     |  |
|    |                                                            |                                                                                                                                                                                     | Tau                                              | 1.133                               | 1.261              |                           |                                     |  |
|    |                                                            |                                                                                                                                                                                     | <b>Goodness of Fit</b>                           | 5.250                               | 2.017              |                           |                                     |  |
|    |                                                            |                                                                                                                                                                                     | Degrees of Freedom                               | 1.197                               | 0.7714             |                           |                                     |  |
|    |                                                            |                                                                                                                                                                                     | R squared                                        | 0.8691                              | 0.3574             |                           |                                     |  |
|    |                                                            |                                                                                                                                                                                     | Sum of Squares                                   | 0.7975                              | 1.939              |                           |                                     |  |
|    |                                                            |                                                                                                                                                                                     | Sy.x                                             | 1.151                               | 2.798              |                           |                                     |  |
|    |                                                            |                                                                                                                                                                                     |                                                  |                                     |                    | Null hypothesis           | "One curve for all data sets"       |  |
|    |                                                            |                                                                                                                                                                                     |                                                  |                                     |                    | Alternative hypothesis    | "Different curve for each data set" |  |
|    |                                                            |                                                                                                                                                                                     |                                                  |                                     |                    | P value                   | 0.1169                              |  |
|    |                                                            |                                                                                                                                                                                     |                                                  |                                     |                    | Conclusion (alpha = 0.05) | "Do not reject null hypothesis"     |  |
|    |                                                            |                                                                                                                                                                                     |                                                  |                                     |                    | Preferred model           | "One curve for all data sets"       |  |
|    |                                                            |                                                                                                                                                                                     | F (DFn, DFd)                                     | "2.010 (3, 108)"                    |                    |                           |                                     |  |
| 3l | Ctrl: 7 (4 males + 3 females); SD: 6 (3 males + 3 females) | Repeated-measure two-way ANOVA<br>Assume sphericity?<br>Yes<br>Factor 1: Stimulus (Tria 1 E, Tria 1 S1, Tria 2 S1, Tria 2 S2)<br>Factor 2: Treatment (Ctrl, SD)<br>Tukey's multiple | Treatment x Stimulus, F (3, 33) = 3.243 P=0.0343 |                                     |                    |                           |                                     |  |
|    |                                                            |                                                                                                                                                                                     | Treatment, F (1, 11) = 0.7310 P=0.4108           |                                     |                    |                           |                                     |  |
|    |                                                            |                                                                                                                                                                                     | Stimulus, F (2.346, 25.81) = 9.644 P=0.0004      |                                     |                    |                           |                                     |  |
|    |                                                            |                                                                                                                                                                                     | Subject, F (11, 33) = 1.604 P=0.1434             |                                     |                    |                           |                                     |  |
|    |                                                            |                                                                                                                                                                                     | Multiple comparisons P:                          |                                     |                    |                           |                                     |  |
|    |                                                            |                                                                                                                                                                                     |                                                  | Ctrl                                | SD                 |                           |                                     |  |
|    |                                                            |                                                                                                                                                                                     | Trial 1 E vs. Trial 1 S1                         | 0.0668                              | 0.2342             |                           |                                     |  |
|    |                                                            |                                                                                                                                                                                     | Trial 1 E vs. Trial 2 S1                         | 0.9286                              | 0.9083             |                           |                                     |  |



|                                                 |                                                                                  | comparisons test (for comparison within group)<br>Bonferroni's multiple comparisons test (for Ctrl vs SD)                                                                                                           | <p>Trial 1 E vs. Trial 2 S2      0.2009      0.2475</p> <p>Trial 1 S1 vs. Trial 2 S1      0.0363      0.2742</p> <p>Trial 1 S1 vs. Trial 2 S2      0.4415      0.0748</p> <p>Trial 2 S1 vs. Trial 2 S2      0.0021      0.5701</p><br><table style="width: 100%; border-collapse: collapse;"> <thead> <tr> <th style="width: 20%;"></th> <th style="width: 15%;">Trial 1, E</th> <th style="width: 15%;">Trial 1, S1</th> <th style="width: 15%;">Trial 2, S1</th> <th style="width: 15%;">Trial 2, S2</th> </tr> </thead> <tbody> <tr> <td>Ctrl vs. SD</td> <td>0.1580</td> <td>&gt;0.9999</td> <td>0.2643</td> <td>0.1721</td> </tr> </tbody> </table>                                                                                                                                                                                                                                                                                         |                               | Trial 1, E | Trial 1, S1                                     | Trial 2, S1              | Trial 2, S2 | Ctrl vs. SD | 0.1580                   | >0.9999 | 0.2643 | 0.1721                   |        |        |                           |        |        |                           |        |        |                           |        |        |
|-------------------------------------------------|----------------------------------------------------------------------------------|---------------------------------------------------------------------------------------------------------------------------------------------------------------------------------------------------------------------|--------------------------------------------------------------------------------------------------------------------------------------------------------------------------------------------------------------------------------------------------------------------------------------------------------------------------------------------------------------------------------------------------------------------------------------------------------------------------------------------------------------------------------------------------------------------------------------------------------------------------------------------------------------------------------------------------------------------------------------------------------------------------------------------------------------------------------------------------------------------------------------------------------------------------------------------------|-------------------------------|------------|-------------------------------------------------|--------------------------|-------------|-------------|--------------------------|---------|--------|--------------------------|--------|--------|---------------------------|--------|--------|---------------------------|--------|--------|---------------------------|--------|--------|
|                                                 | Trial 1, E                                                                       | Trial 1, S1                                                                                                                                                                                                         | Trial 2, S1                                                                                                                                                                                                                                                                                                                                                                                                                                                                                                                                                                                                                                                                                                                                                                                                                                                                                                                                      | Trial 2, S2                   |            |                                                 |                          |             |             |                          |         |        |                          |        |        |                           |        |        |                           |        |        |                           |        |        |
| Ctrl vs. SD                                     | 0.1580                                                                           | >0.9999                                                                                                                                                                                                             | 0.2643                                                                                                                                                                                                                                                                                                                                                                                                                                                                                                                                                                                                                                                                                                                                                                                                                                                                                                                                           | 0.1721                        |            |                                                 |                          |             |             |                          |         |        |                          |        |        |                           |        |        |                           |        |        |                           |        |        |
| 3m                                              | 7 (4 males + 3 females)                                                          | Mann-Whitney test                                                                                                                                                                                                   | Mann-Whitney U = 6, Two-tailed P = 0.0175                                                                                                                                                                                                                                                                                                                                                                                                                                                                                                                                                                                                                                                                                                                                                                                                                                                                                                        |                               |            |                                                 |                          |             |             |                          |         |        |                          |        |        |                           |        |        |                           |        |        |                           |        |        |
| 3n                                              | 6 (3 males + 3 females)                                                          | Unpaired t test with Welch's correction                                                                                                                                                                             | t=0.9233, df=16.97, Two-tailed P = 0.0035                                                                                                                                                                                                                                                                                                                                                                                                                                                                                                                                                                                                                                                                                                                                                                                                                                                                                                        |                               |            |                                                 |                          |             |             |                          |         |        |                          |        |        |                           |        |        |                           |        |        |                           |        |        |
| 3o                                              | 7 (4 males + 3 females)                                                          | Unpaired t test with Welch's correction                                                                                                                                                                             | t=2.425, df=6.594, Two-tailed P = 0.0479                                                                                                                                                                                                                                                                                                                                                                                                                                                                                                                                                                                                                                                                                                                                                                                                                                                                                                         |                               |            |                                                 |                          |             |             |                          |         |        |                          |        |        |                           |        |        |                           |        |        |                           |        |        |
| 3p                                              | 6 (3 males + 3 females)                                                          | Unpaired t test with Welch's correction                                                                                                                                                                             | t=0.7349, df=8.197, Two-tailed P = 0.4829                                                                                                                                                                                                                                                                                                                                                                                                                                                                                                                                                                                                                                                                                                                                                                                                                                                                                                        |                               |            |                                                 |                          |             |             |                          |         |        |                          |        |        |                           |        |        |                           |        |        |                           |        |        |
| 4h                                              | Ctrl: 43 neurons (4 mice, all males)<br>SD: 35 neurons (4 mice, all males)       | Unpaired t test with Welch's correction                                                                                                                                                                             | t =5.066, df=5.190, Two-tailed P = 0.0011                                                                                                                                                                                                                                                                                                                                                                                                                                                                                                                                                                                                                                                                                                                                                                                                                                                                                                        |                               |            |                                                 |                          |             |             |                          |         |        |                          |        |        |                           |        |        |                           |        |        |                           |        |        |
| 4i                                              | Ctrl: 39 neurons (4 mice, all males)<br>SD: 35 neurons (4 mice, all males)       | Mann-Whitney test                                                                                                                                                                                                   | Mann-Whitney U = 608, Two-tailed P = 0.4248                                                                                                                                                                                                                                                                                                                                                                                                                                                                                                                                                                                                                                                                                                                                                                                                                                                                                                      |                               |            |                                                 |                          |             |             |                          |         |        |                          |        |        |                           |        |        |                           |        |        |                           |        |        |
| 4j                                              | Ctrl: 42 neurons (5 mice, all males)<br>SD: 37 neurons (5 mice, all males)       | Unpaired t test with Welch's correction                                                                                                                                                                             | t = 4.018, df = 76.98, Two-tailed P = 0.0001                                                                                                                                                                                                                                                                                                                                                                                                                                                                                                                                                                                                                                                                                                                                                                                                                                                                                                     |                               |            |                                                 |                          |             |             |                          |         |        |                          |        |        |                           |        |        |                           |        |        |                           |        |        |
| 4k                                              | Ctrl: 42 neurons (5 mice, all males)<br>SD: 36 neurons (5 mice, all males)       | Unpaired t test with Welch's correction                                                                                                                                                                             | t=4.351, df=73.78, Two-tailed P = 0.0000429                                                                                                                                                                                                                                                                                                                                                                                                                                                                                                                                                                                                                                                                                                                                                                                                                                                                                                      |                               |            |                                                 |                          |             |             |                          |         |        |                          |        |        |                           |        |        |                           |        |        |                           |        |        |
| 4l                                              | Ctrl: 38 neurons (5 mice, all males)<br>SD: 44 neurons (5 mice, all males)       | Unpaired t test with Welch's correction                                                                                                                                                                             | t=1.531, df=70.10, Two-tailed P = 0.1302                                                                                                                                                                                                                                                                                                                                                                                                                                                                                                                                                                                                                                                                                                                                                                                                                                                                                                         |                               |            |                                                 |                          |             |             |                          |         |        |                          |        |        |                           |        |        |                           |        |        |                           |        |        |
| 4m                                              | Ctrl: 38 neurons (5 mice, all males)<br>SD: 43 neurons (5 mice, all males)       | Mann-Whitney test                                                                                                                                                                                                   | Mann-Whitney U = 485, Two-tailed P = 0.0015                                                                                                                                                                                                                                                                                                                                                                                                                                                                                                                                                                                                                                                                                                                                                                                                                                                                                                      |                               |            |                                                 |                          |             |             |                          |         |        |                          |        |        |                           |        |        |                           |        |        |                           |        |        |
| 5c                                              | Cre-: 8<br>hM3Dq <sup>DAT</sup> : 9<br>(all males)                               | Repeated-measure two-way ANOVA<br>Assume sphericity? No<br>Factor 1: Stimulus (Tria 1 E, Tria 1 S1, Tria 2 S1, Tria 2 S2)<br>Factor 2: Treatment (Cre-, hM3Dq <sup>DAT</sup> )<br>Tukey's multiple comparisons test | <p>Stimulus x Treatment, F (3, 45) = 3.930 P=0.0142</p> <p>Stimulus, F (3, 45) = 21.99 P&lt;0.0001</p> <p>Treatment, F (1, 15) = 0.07179 P=0.7924</p> <p>Subject, F (15, 45) = 3.406 P=0.0007</p> <p>Multiple comparisons P:</p> <table style="width: 100%; border-collapse: collapse;"> <thead> <tr> <th style="width: 60%;"></th> <th style="width: 20%;">Cre-</th> <th style="width: 20%;">hM3Dq<sup>DAT</sup></th> </tr> </thead> <tbody> <tr> <td>Trial 1 E vs. Trial 1 S1</td> <td>0.0239</td> <td>0.0190</td> </tr> <tr> <td>Trial 1 E vs. Trial 2 S1</td> <td>0.9747</td> <td>0.3759</td> </tr> <tr> <td>Trial 1 E vs. Trial 2 S2</td> <td>0.0130</td> <td>0.0027</td> </tr> <tr> <td>Trial 1 S1 vs. Trial 2 S1</td> <td>0.0232</td> <td>0.0100</td> </tr> <tr> <td>Trial 1 S1 vs. Trial 2 S2</td> <td>0.9998</td> <td>0.1647</td> </tr> <tr> <td>Trial 2 S1 vs. Trial 2 S2</td> <td>0.0194</td> <td>0.9042</td> </tr> </tbody> </table> |                               | Cre-       | hM3Dq <sup>DAT</sup>                            | Trial 1 E vs. Trial 1 S1 | 0.0239      | 0.0190      | Trial 1 E vs. Trial 2 S1 | 0.9747  | 0.3759 | Trial 1 E vs. Trial 2 S2 | 0.0130 | 0.0027 | Trial 1 S1 vs. Trial 2 S1 | 0.0232 | 0.0100 | Trial 1 S1 vs. Trial 2 S2 | 0.9998 | 0.1647 | Trial 2 S1 vs. Trial 2 S2 | 0.0194 | 0.9042 |
|                                                 | Cre-                                                                             | hM3Dq <sup>DAT</sup>                                                                                                                                                                                                |                                                                                                                                                                                                                                                                                                                                                                                                                                                                                                                                                                                                                                                                                                                                                                                                                                                                                                                                                  |                               |            |                                                 |                          |             |             |                          |         |        |                          |        |        |                           |        |        |                           |        |        |                           |        |        |
| Trial 1 E vs. Trial 1 S1                        | 0.0239                                                                           | 0.0190                                                                                                                                                                                                              |                                                                                                                                                                                                                                                                                                                                                                                                                                                                                                                                                                                                                                                                                                                                                                                                                                                                                                                                                  |                               |            |                                                 |                          |             |             |                          |         |        |                          |        |        |                           |        |        |                           |        |        |                           |        |        |
| Trial 1 E vs. Trial 2 S1                        | 0.9747                                                                           | 0.3759                                                                                                                                                                                                              |                                                                                                                                                                                                                                                                                                                                                                                                                                                                                                                                                                                                                                                                                                                                                                                                                                                                                                                                                  |                               |            |                                                 |                          |             |             |                          |         |        |                          |        |        |                           |        |        |                           |        |        |                           |        |        |
| Trial 1 E vs. Trial 2 S2                        | 0.0130                                                                           | 0.0027                                                                                                                                                                                                              |                                                                                                                                                                                                                                                                                                                                                                                                                                                                                                                                                                                                                                                                                                                                                                                                                                                                                                                                                  |                               |            |                                                 |                          |             |             |                          |         |        |                          |        |        |                           |        |        |                           |        |        |                           |        |        |
| Trial 1 S1 vs. Trial 2 S1                       | 0.0232                                                                           | 0.0100                                                                                                                                                                                                              |                                                                                                                                                                                                                                                                                                                                                                                                                                                                                                                                                                                                                                                                                                                                                                                                                                                                                                                                                  |                               |            |                                                 |                          |             |             |                          |         |        |                          |        |        |                           |        |        |                           |        |        |                           |        |        |
| Trial 1 S1 vs. Trial 2 S2                       | 0.9998                                                                           | 0.1647                                                                                                                                                                                                              |                                                                                                                                                                                                                                                                                                                                                                                                                                                                                                                                                                                                                                                                                                                                                                                                                                                                                                                                                  |                               |            |                                                 |                          |             |             |                          |         |        |                          |        |        |                           |        |        |                           |        |        |                           |        |        |
| Trial 2 S1 vs. Trial 2 S2                       | 0.0194                                                                           | 0.9042                                                                                                                                                                                                              |                                                                                                                                                                                                                                                                                                                                                                                                                                                                                                                                                                                                                                                                                                                                                                                                                                                                                                                                                  |                               |            |                                                 |                          |             |             |                          |         |        |                          |        |        |                           |        |        |                           |        |        |                           |        |        |
| 5d                                              | Cre-: 8<br>mCherry <sup>DAT</sup> : 4<br>hM3Dq <sup>DAT</sup> : 9<br>(all males) | One-way ANOVA followed by Sidak's multiple comparisons test                                                                                                                                                         | <p>Treatment, F (2, 18) = 1.743 P=0.2033</p> <p>Sidak's multiple comparisons:</p> <table style="width: 100%; border-collapse: collapse;"> <tbody> <tr> <td style="width: 60%;">Cre- vs. hM3Dq<sup>DAT</sup></td> <td style="width: 40%;">0.6815</td> </tr> <tr> <td>mCherry<sup>DAT</sup> vs. hM3Dq<sup>DAT</sup></td> <td>0.1511</td> </tr> </tbody> </table>                                                                                                                                                                                                                                                                                                                                                                                                                                                                                                                                                                                   | Cre- vs. hM3Dq <sup>DAT</sup> | 0.6815     | mCherry <sup>DAT</sup> vs. hM3Dq <sup>DAT</sup> | 0.1511                   |             |             |                          |         |        |                          |        |        |                           |        |        |                           |        |        |                           |        |        |
| Cre- vs. hM3Dq <sup>DAT</sup>                   | 0.6815                                                                           |                                                                                                                                                                                                                     |                                                                                                                                                                                                                                                                                                                                                                                                                                                                                                                                                                                                                                                                                                                                                                                                                                                                                                                                                  |                               |            |                                                 |                          |             |             |                          |         |        |                          |        |        |                           |        |        |                           |        |        |                           |        |        |
| mCherry <sup>DAT</sup> vs. hM3Dq <sup>DAT</sup> | 0.1511                                                                           |                                                                                                                                                                                                                     |                                                                                                                                                                                                                                                                                                                                                                                                                                                                                                                                                                                                                                                                                                                                                                                                                                                                                                                                                  |                               |            |                                                 |                          |             |             |                          |         |        |                          |        |        |                           |        |        |                           |        |        |                           |        |        |
| 5e                                              | Cre-: 8<br>mCherry <sup>DAT</sup> : 4<br>hM3Dq <sup>DAT</sup> : 9                | One-way ANOVA followed by Sidak's multiple                                                                                                                                                                          | <p>Treatment, F (2, 18) = 10.58 P=0.0009</p> <p>Sidak's multiple comparisons:</p> <table style="width: 100%; border-collapse: collapse;"> <tbody> <tr> <td style="width: 60%;">Cre- vs. hM3Dq<sup>DAT</sup></td> <td style="width: 40%;">0.0009</td> </tr> </tbody> </table>                                                                                                                                                                                                                                                                                                                                                                                                                                                                                                                                                                                                                                                                     | Cre- vs. hM3Dq <sup>DAT</sup> | 0.0009     |                                                 |                          |             |             |                          |         |        |                          |        |        |                           |        |        |                           |        |        |                           |        |        |
| Cre- vs. hM3Dq <sup>DAT</sup>                   | 0.0009                                                                           |                                                                                                                                                                                                                     |                                                                                                                                                                                                                                                                                                                                                                                                                                                                                                                                                                                                                                                                                                                                                                                                                                                                                                                                                  |                               |            |                                                 |                          |             |             |                          |         |        |                          |        |        |                           |        |        |                           |        |        |                           |        |        |

|                           | (all males)                                                                                                      | comparisons test                                                                                                                                                                                                                       | mCherryDAT vs. hM3Dq <sup>DAT</sup> 0.0110                                                                                                                                                                                                                                                                                                                                                                                                                                                                                                                                                                                                                                                                                                                                                                                                     |  |                        |                      |                          |        |        |                          |        |        |                          |        |        |                           |        |        |                           |        |        |                           |        |        |
|---------------------------|------------------------------------------------------------------------------------------------------------------|----------------------------------------------------------------------------------------------------------------------------------------------------------------------------------------------------------------------------------------|------------------------------------------------------------------------------------------------------------------------------------------------------------------------------------------------------------------------------------------------------------------------------------------------------------------------------------------------------------------------------------------------------------------------------------------------------------------------------------------------------------------------------------------------------------------------------------------------------------------------------------------------------------------------------------------------------------------------------------------------------------------------------------------------------------------------------------------------|--|------------------------|----------------------|--------------------------|--------|--------|--------------------------|--------|--------|--------------------------|--------|--------|---------------------------|--------|--------|---------------------------|--------|--------|---------------------------|--------|--------|
| 5g                        | mCherry <sup>DAT</sup> : 8 (5 males + 3 females)<br>hM4Di <sup>DAT</sup> : 10 (8 males + 2 females)              | Repeated-measure two-way ANOVA<br>Assume sphericity? No<br>Factor 1: Stimulus (Tria 1 E, Tria 1 S1, Tria 2 S1, Tria 2 S2)<br>Factor 2: Treatment (mCherry <sup>DAT</sup> , hM4Di <sup>DAT</sup> )<br>Tukey's multiple comparisons test | Stimulus x Treatment, F (3, 48) = 1.950 P=0.1341<br>Stimulus, F (2.256, 36.10) = 28.85 P<0.0001<br>Treatment, F (1, 16) = 2.202 P=0.1573<br>Subject, F (16, 48) = 2.430 P=0.0091<br>Multiple comparisons P:<br><table border="1"> <thead> <tr> <th></th> <th>mCherry<sup>DAT</sup></th> <th>hM4Di<sup>DAT</sup></th> </tr> </thead> <tbody> <tr> <td>Trial 1 E vs. Trial 1 S1</td> <td>0.0069</td> <td>0.0055</td> </tr> <tr> <td>Trial 1 E vs. Trial 2 S1</td> <td>0.6704</td> <td>0.9513</td> </tr> <tr> <td>Trial 1 E vs. Trial 2 S2</td> <td>0.4371</td> <td>0.0156</td> </tr> <tr> <td>Trial 1 S1 vs. Trial 2 S1</td> <td>0.0107</td> <td>0.0003</td> </tr> <tr> <td>Trial 1 S1 vs. Trial 2 S2</td> <td>0.0912</td> <td>0.4392</td> </tr> <tr> <td>Trial 2 S1 vs. Trial 2 S2</td> <td>0.4719</td> <td>0.0038</td> </tr> </tbody> </table> |  | mCherry <sup>DAT</sup> | hM4Di <sup>DAT</sup> | Trial 1 E vs. Trial 1 S1 | 0.0069 | 0.0055 | Trial 1 E vs. Trial 2 S1 | 0.6704 | 0.9513 | Trial 1 E vs. Trial 2 S2 | 0.4371 | 0.0156 | Trial 1 S1 vs. Trial 2 S1 | 0.0107 | 0.0003 | Trial 1 S1 vs. Trial 2 S2 | 0.0912 | 0.4392 | Trial 2 S1 vs. Trial 2 S2 | 0.4719 | 0.0038 |
|                           | mCherry <sup>DAT</sup>                                                                                           | hM4Di <sup>DAT</sup>                                                                                                                                                                                                                   |                                                                                                                                                                                                                                                                                                                                                                                                                                                                                                                                                                                                                                                                                                                                                                                                                                                |  |                        |                      |                          |        |        |                          |        |        |                          |        |        |                           |        |        |                           |        |        |                           |        |        |
| Trial 1 E vs. Trial 1 S1  | 0.0069                                                                                                           | 0.0055                                                                                                                                                                                                                                 |                                                                                                                                                                                                                                                                                                                                                                                                                                                                                                                                                                                                                                                                                                                                                                                                                                                |  |                        |                      |                          |        |        |                          |        |        |                          |        |        |                           |        |        |                           |        |        |                           |        |        |
| Trial 1 E vs. Trial 2 S1  | 0.6704                                                                                                           | 0.9513                                                                                                                                                                                                                                 |                                                                                                                                                                                                                                                                                                                                                                                                                                                                                                                                                                                                                                                                                                                                                                                                                                                |  |                        |                      |                          |        |        |                          |        |        |                          |        |        |                           |        |        |                           |        |        |                           |        |        |
| Trial 1 E vs. Trial 2 S2  | 0.4371                                                                                                           | 0.0156                                                                                                                                                                                                                                 |                                                                                                                                                                                                                                                                                                                                                                                                                                                                                                                                                                                                                                                                                                                                                                                                                                                |  |                        |                      |                          |        |        |                          |        |        |                          |        |        |                           |        |        |                           |        |        |                           |        |        |
| Trial 1 S1 vs. Trial 2 S1 | 0.0107                                                                                                           | 0.0003                                                                                                                                                                                                                                 |                                                                                                                                                                                                                                                                                                                                                                                                                                                                                                                                                                                                                                                                                                                                                                                                                                                |  |                        |                      |                          |        |        |                          |        |        |                          |        |        |                           |        |        |                           |        |        |                           |        |        |
| Trial 1 S1 vs. Trial 2 S2 | 0.0912                                                                                                           | 0.4392                                                                                                                                                                                                                                 |                                                                                                                                                                                                                                                                                                                                                                                                                                                                                                                                                                                                                                                                                                                                                                                                                                                |  |                        |                      |                          |        |        |                          |        |        |                          |        |        |                           |        |        |                           |        |        |                           |        |        |
| Trial 2 S1 vs. Trial 2 S2 | 0.4719                                                                                                           | 0.0038                                                                                                                                                                                                                                 |                                                                                                                                                                                                                                                                                                                                                                                                                                                                                                                                                                                                                                                                                                                                                                                                                                                |  |                        |                      |                          |        |        |                          |        |        |                          |        |        |                           |        |        |                           |        |        |                           |        |        |
| 5h                        | mCherry <sup>DAT</sup> : 8 (5 males + 3 females)<br>hM4Di <sup>DAT</sup> : 10 (8 males + 2 females)              | Unpaired t test with Welch's correction                                                                                                                                                                                                | t = 0.6081, df = 14.60, Two-tailed P = 0.5524                                                                                                                                                                                                                                                                                                                                                                                                                                                                                                                                                                                                                                                                                                                                                                                                  |  |                        |                      |                          |        |        |                          |        |        |                          |        |        |                           |        |        |                           |        |        |                           |        |        |
| 5i                        | mCherry <sup>DAT</sup> : 8 (5 males + 3 females)<br>hM4Di <sup>DAT</sup> : 10 (8 males + 2 females)              | Unpaired t test with Welch's correction                                                                                                                                                                                                | t = 3.585, df = 15.51, Two-tailed P = 0.0026                                                                                                                                                                                                                                                                                                                                                                                                                                                                                                                                                                                                                                                                                                                                                                                                   |  |                        |                      |                          |        |        |                          |        |        |                          |        |        |                           |        |        |                           |        |        |                           |        |        |
| 5k                        | Control virus: 33 neurons (4 mice, all males)<br>hM3Dq <sup>DAT</sup> : 35 neurons (4 mice, all males)           | Unpaired t test with Welch's correction                                                                                                                                                                                                | t = 2.826, df = 61.07, Two-tailed P = 0.0064                                                                                                                                                                                                                                                                                                                                                                                                                                                                                                                                                                                                                                                                                                                                                                                                   |  |                        |                      |                          |        |        |                          |        |        |                          |        |        |                           |        |        |                           |        |        |                           |        |        |
| 5l                        | Control virus: 22 neurons (4 mice, all males)<br>hM3Dq <sup>DAT</sup> : 33 neurons (4 mice, all males)           | Mann-Whitney test                                                                                                                                                                                                                      | Mann-Whitney U = 277, Two-tailed P = 0.1400                                                                                                                                                                                                                                                                                                                                                                                                                                                                                                                                                                                                                                                                                                                                                                                                    |  |                        |                      |                          |        |        |                          |        |        |                          |        |        |                           |        |        |                           |        |        |                           |        |        |
| 5n                        | SD + Control virus: 38 neurons (4 mice, all males)<br>SD + hM4Di <sup>DAT</sup> : 42 neurons (4 mice, all males) | Mann-Whitney test                                                                                                                                                                                                                      | Mann-Whitney U = 525.5, Two-tailed P = 0.0080                                                                                                                                                                                                                                                                                                                                                                                                                                                                                                                                                                                                                                                                                                                                                                                                  |  |                        |                      |                          |        |        |                          |        |        |                          |        |        |                           |        |        |                           |        |        |                           |        |        |
| 5o                        | SD + Control virus: 37 neurons (4 mice, all males)<br>SD + hM4Di <sup>DAT</sup> : 39 neurons (4 mice, all males) | Unpaired t test with Welch's correction                                                                                                                                                                                                | t = 1.311, df = 73.45, Two-tailed P = 0.1940                                                                                                                                                                                                                                                                                                                                                                                                                                                                                                                                                                                                                                                                                                                                                                                                   |  |                        |                      |                          |        |        |                          |        |        |                          |        |        |                           |        |        |                           |        |        |                           |        |        |
| 6b                        | Veh: 7 (6 males + 1 female)<br>Flup: 8 (all males)                                                               | Repeated-measure two-way ANOVA<br>Assume sphericity? Yes<br>Factor 1: Time (ZT)<br>Factor 2: Treatment (Vehicle, Flup)<br>Bonferroni's multiple comparisons test                                                                       | Time x Treatment, F (23, 299) = 2.608 P=0.0001<br>Time, F (23, 299) = 8.225 P<0.0001<br>Treatment, F (1, 13) = 2.196 P=0.1622<br>Subject, F (13, 299) = 9.723 P<0.0001<br>Multiple comparisons P:<br>Veh vs. Flup<br>ZT0-1 >0.9999<br>ZT1-2 >0.9999<br>ZT2-3 0.0000220<br>ZT3-4 0.0055                                                                                                                                                                                                                                                                                                                                                                                                                                                                                                                                                         |  |                        |                      |                          |        |        |                          |        |        |                          |        |        |                           |        |        |                           |        |        |                           |        |        |

|                           |                                                                    |                                                                                                                                                                                                       | ZT4-5 >0.9999<br>ZT5-6 0.0393<br>ZT6-7 >0.9999<br>ZT7-8 >0.9999<br>ZT8-9 >0.9999<br>ZT9-10 >0.9999<br>ZT10-11 >0.9999<br>ZT11-12 >0.9999<br>ZT12-13 >0.9999<br>ZT13-14 >0.9999<br>ZT14-15 >0.9999<br>ZT15-16 >0.9999<br>ZT16-17 >0.9999<br>ZT17-18 >0.9999<br>ZT18-19 >0.9999<br>ZT19-20 >0.9999<br>ZT20-21 >0.9999<br>ZT21-22 >0.9999<br>ZT22-23 >0.9999<br>ZT23-24 >0.9999                                                                                                                                                                                                                                                                                                                                                                                                                                                  |  |         |      |                          |        |        |                          |        |        |                          |        |        |                           |        |        |                           |        |        |                           |        |        |
|---------------------------|--------------------------------------------------------------------|-------------------------------------------------------------------------------------------------------------------------------------------------------------------------------------------------------|-------------------------------------------------------------------------------------------------------------------------------------------------------------------------------------------------------------------------------------------------------------------------------------------------------------------------------------------------------------------------------------------------------------------------------------------------------------------------------------------------------------------------------------------------------------------------------------------------------------------------------------------------------------------------------------------------------------------------------------------------------------------------------------------------------------------------------|--|---------|------|--------------------------|--------|--------|--------------------------|--------|--------|--------------------------|--------|--------|---------------------------|--------|--------|---------------------------|--------|--------|---------------------------|--------|--------|
| 6c                        | Veh: 7 (6 males + 1 female)<br>Flup: 8 (all males)                 | Unpaired t test with Welch's correction (for Wake & NREM)<br>Mann-Whitney test (for REM)                                                                                                              | Wake, $t = 3.090$ , $df = 7.876$ , Two-tailed $P = 0.0152$<br>NREM, $t = 3.331$ , $df = 8.847$ , Two-tailed $P = 0.0090$<br><br>REM, Mann-Whitney $U = 16$ , Two-tailed $P = 0.1893$                                                                                                                                                                                                                                                                                                                                                                                                                                                                                                                                                                                                                                          |  |         |      |                          |        |        |                          |        |        |                          |        |        |                           |        |        |                           |        |        |                           |        |        |
| 6d                        | 12 each (6 males + 6 females)                                      | Repeated-measure two-way ANOVA<br>Assume sphericity? No<br>Factor 1: Stimulus (Tria 1 E, Tria 1 S1, Tria 2 S1, Tria 2 S2)<br>Factor 2: Treatment (Vehicle, Flup)<br>Tukey's multiple comparisons test | Stimulus x Treatment, $F(3, 66) = 3.952$ $P=0.0118$<br>Stimulus, $F(1.956, 43.04) = 31.66$ $P<0.0001$<br>Treatment, $F(1, 22) = 1.510$ $P=0.2321$<br>Subject, $F(22, 66) = 1.741$ $P=0.0438$<br>Multiple comparisons P:<br><table border="1"> <thead> <tr> <th></th> <th>Vehicle</th> <th>Flup</th> </tr> </thead> <tbody> <tr> <td>Trial 1 E vs. Trial 1 S1</td> <td>0.0005</td> <td>0.0004</td> </tr> <tr> <td>Trial 1 E vs. Trial 2 S1</td> <td>0.0047</td> <td>0.0619</td> </tr> <tr> <td>Trial 1 E vs. Trial 2 S2</td> <td>0.0040</td> <td>0.0007</td> </tr> <tr> <td>Trial 1 S1 vs. Trial 2 S1</td> <td>0.0208</td> <td>0.0021</td> </tr> <tr> <td>Trial 1 S1 vs. Trial 2 S2</td> <td>0.0221</td> <td>0.7054</td> </tr> <tr> <td>Trial 2 S1 vs. Trial 2 S2</td> <td>0.9874</td> <td>0.0204</td> </tr> </tbody> </table> |  | Vehicle | Flup | Trial 1 E vs. Trial 1 S1 | 0.0005 | 0.0004 | Trial 1 E vs. Trial 2 S1 | 0.0047 | 0.0619 | Trial 1 E vs. Trial 2 S2 | 0.0040 | 0.0007 | Trial 1 S1 vs. Trial 2 S1 | 0.0208 | 0.0021 | Trial 1 S1 vs. Trial 2 S2 | 0.0221 | 0.7054 | Trial 2 S1 vs. Trial 2 S2 | 0.9874 | 0.0204 |
|                           | Vehicle                                                            | Flup                                                                                                                                                                                                  |                                                                                                                                                                                                                                                                                                                                                                                                                                                                                                                                                                                                                                                                                                                                                                                                                               |  |         |      |                          |        |        |                          |        |        |                          |        |        |                           |        |        |                           |        |        |                           |        |        |
| Trial 1 E vs. Trial 1 S1  | 0.0005                                                             | 0.0004                                                                                                                                                                                                |                                                                                                                                                                                                                                                                                                                                                                                                                                                                                                                                                                                                                                                                                                                                                                                                                               |  |         |      |                          |        |        |                          |        |        |                          |        |        |                           |        |        |                           |        |        |                           |        |        |
| Trial 1 E vs. Trial 2 S1  | 0.0047                                                             | 0.0619                                                                                                                                                                                                |                                                                                                                                                                                                                                                                                                                                                                                                                                                                                                                                                                                                                                                                                                                                                                                                                               |  |         |      |                          |        |        |                          |        |        |                          |        |        |                           |        |        |                           |        |        |                           |        |        |
| Trial 1 E vs. Trial 2 S2  | 0.0040                                                             | 0.0007                                                                                                                                                                                                |                                                                                                                                                                                                                                                                                                                                                                                                                                                                                                                                                                                                                                                                                                                                                                                                                               |  |         |      |                          |        |        |                          |        |        |                          |        |        |                           |        |        |                           |        |        |                           |        |        |
| Trial 1 S1 vs. Trial 2 S1 | 0.0208                                                             | 0.0021                                                                                                                                                                                                |                                                                                                                                                                                                                                                                                                                                                                                                                                                                                                                                                                                                                                                                                                                                                                                                                               |  |         |      |                          |        |        |                          |        |        |                          |        |        |                           |        |        |                           |        |        |                           |        |        |
| Trial 1 S1 vs. Trial 2 S2 | 0.0221                                                             | 0.7054                                                                                                                                                                                                |                                                                                                                                                                                                                                                                                                                                                                                                                                                                                                                                                                                                                                                                                                                                                                                                                               |  |         |      |                          |        |        |                          |        |        |                          |        |        |                           |        |        |                           |        |        |                           |        |        |
| Trial 2 S1 vs. Trial 2 S2 | 0.9874                                                             | 0.0204                                                                                                                                                                                                |                                                                                                                                                                                                                                                                                                                                                                                                                                                                                                                                                                                                                                                                                                                                                                                                                               |  |         |      |                          |        |        |                          |        |        |                          |        |        |                           |        |        |                           |        |        |                           |        |        |
| 6e                        | 12 each (6 males + 6 females)                                      | Mann-Whitney test                                                                                                                                                                                     | Mann-Whitney $U = 45$ , Two-tailed $P = 0.1277$                                                                                                                                                                                                                                                                                                                                                                                                                                                                                                                                                                                                                                                                                                                                                                               |  |         |      |                          |        |        |                          |        |        |                          |        |        |                           |        |        |                           |        |        |                           |        |        |
| 6f                        | 12 each (6 males + 6 females)                                      | Mann-Whitney test                                                                                                                                                                                     | Mann-Whitney $U = 8$ , Two-tailed $P = 0.0000496$                                                                                                                                                                                                                                                                                                                                                                                                                                                                                                                                                                                                                                                                                                                                                                             |  |         |      |                          |        |        |                          |        |        |                          |        |        |                           |        |        |                           |        |        |                           |        |        |
| 6j                        | 11 each (8 males + 3 females)                                      | Kolmogorov-Smirnov test (for cumulative distributions of frequency steps)<br>Paired t test (for total power of each frequency bands)                                                                  | Kolmogorov-Smirnov $D = 0.1435$ , $P = 0.0001$<br><br>Paired t tests (OFF vs 1-Hz):<br>$\delta$ (<4Hz), $t = 2.350$ , $df = 10.00$ , Two-tailed $P = 0.0406$<br>$\theta$ (4 - 7Hz), $t = 3.026$ , $df = 10.00$ , Two-tailed $P = 0.0128$<br>$\alpha$ (7 - 12Hz), $t = 0.4240$ , $df = 10.00$ , Two-tailed $P = 0.6805$<br>$\beta$ (12 - 30Hz), $t = 1.876$ , $df = 10.00$ , Two-tailed $P = 0.0902$                                                                                                                                                                                                                                                                                                                                                                                                                           |  |         |      |                          |        |        |                          |        |        |                          |        |        |                           |        |        |                           |        |        |                           |        |        |
| 6k                        | 11 each (8 males + 3 females)                                      | Paired t test for each state                                                                                                                                                                          | Wake, $t = 0.4480$ , $df = 10.00$ , Two-tailed $P = 0.6637$<br>NREM, $t = 0.1850$ , $df = 10.00$ , Two-tailed $P = 0.8570$<br>REM, $t = 0.6813$ , $df = 10.00$ , Two-tailed $P = 0.5111$                                                                                                                                                                                                                                                                                                                                                                                                                                                                                                                                                                                                                                      |  |         |      |                          |        |        |                          |        |        |                          |        |        |                           |        |        |                           |        |        |                           |        |        |
| 6l                        | No stim: 9 (6 males + 3 females)<br>1-Hz: 10 (8 males + 3 females) | Repeated-measure two-way ANOVA<br>Assume sphericity? No<br>Factor 1: Stimulus (Tria 1 E, Tria 1 S1, Tria 2 S1, Tria 2 S2)<br>Factor 2: Treatment (No stim, 1-Hz)                                      | Stimulus x Treatment, $F(3, 51) = 1.715$ $P=0.1755$<br>Stimulus, $F(2.025, 34.42) = 19.85$ $P<0.0001$<br>Treatment, $F(1, 17) = 0.5817$ $P=0.4561$<br>Subject, $F(17, 51) = 2.336$ $P=0.0101$<br>Multiple comparisons P:<br><table border="1"> <thead> <tr> <th></th> <th>No stim</th> <th>1-Hz</th> </tr> </thead> <tbody> <tr> <td>Trial 1 E vs. Trial 1 S1</td> <td>0.0271</td> <td>0.0056</td> </tr> </tbody> </table>                                                                                                                                                                                                                                                                                                                                                                                                    |  | No stim | 1-Hz | Trial 1 E vs. Trial 1 S1 | 0.0271 | 0.0056 |                          |        |        |                          |        |        |                           |        |        |                           |        |        |                           |        |        |
|                           | No stim                                                            | 1-Hz                                                                                                                                                                                                  |                                                                                                                                                                                                                                                                                                                                                                                                                                                                                                                                                                                                                                                                                                                                                                                                                               |  |         |      |                          |        |        |                          |        |        |                          |        |        |                           |        |        |                           |        |        |                           |        |        |
| Trial 1 E vs. Trial 1 S1  | 0.0271                                                             | 0.0056                                                                                                                                                                                                |                                                                                                                                                                                                                                                                                                                                                                                                                                                                                                                                                                                                                                                                                                                                                                                                                               |  |         |      |                          |        |        |                          |        |        |                          |        |        |                           |        |        |                           |        |        |                           |        |        |
